# Supplementary material
Source: publisher figshare collection journal article supplement (https://gsapubs.figshare.com/articles/dataset/_/12541208)
Supplement: Supplementary file 1 [file 1]

Munroe, J.S., and Laabs, B.J.C., 2019, Multiproxy lacustrine records of post-glacial environmental change from the Uinta Mountains, Utah, USA: GSA Bulletin, <https://doi.org/10.1130/B35056.1>.

## Data Repository

### Supplemental Figures:

DR1. Land-cover types in the watersheds surrounding the cored lakes  
DR2. The coring platform on the shore of North Star Lake (04-09, H)  
DR3. Annotated standard template for presenting multiproxy records from the Uinta lake cores  
DR4. Core 04-01 (A), Marshall Lake  
DR5. Core 04-02 (B), Hoover Lake  
DR6. Core 04-03 (C), Pyramid Lake  
DR7. Core 04-04 (D), Elbow Lake  
DR8. Core 04-06 (E), Swasey Lake  
DR9. Core 04-07 (F), Spider Lake  
DR10. Core 04-08 (G), Little Superior Lake  
DR11. Core 04-09 (H), North Star Lake  
DR12. Core 05-01 (I), Reader Lake  
DR13. Core 05-02 (J), Ostler Lake  
DR14. Core 05-03 (K), Kermis Lake  
DR15. Core 05-04 (L), Ryder Lake  
DR16. Core 05-05 (M), Lower Red Castle Lake  
DR17. Core 05-06 (N), Bald Lake  
DR18. Core 05-07 (O), Hessie Lake  
DR19. Core 05-08 (P), Dead Horse Lake  
DR20. Core 05-09d (Q), Island Lake  
DR21. Core 05-09e (R), Island Lake  
DR22. Core 05-10 (S), Taylor Lake  
DR23. Core 06-01 (T), Upper Lily Lake  
DR24. Core 98-01 (U), Hacking Lake  
DR25. Normalized rare earth element (REE) patterns for Rare earth element abundances, normalized to a chondrite standard<sup>1</sup>, in submicron material from Uinta lake sediment samples compared to an array of Uinta soil samples. In both types of samples, submicron material was separated by dispersion in distilled water and centrifuging before analysis with ICP-MS.

### Supplemental Tables:

Table DR1. Radiocarbon dates for Uinta Mountain lake cores  
Table DR2. Characteristics of depth-age models for the Uinta Mountain lake cores  
Table DR3. Relationship between %LOI and C:N in Uinta Mountain lake cores

### Supplemental Data:

Uinta-Lake-Dataset.xlsx

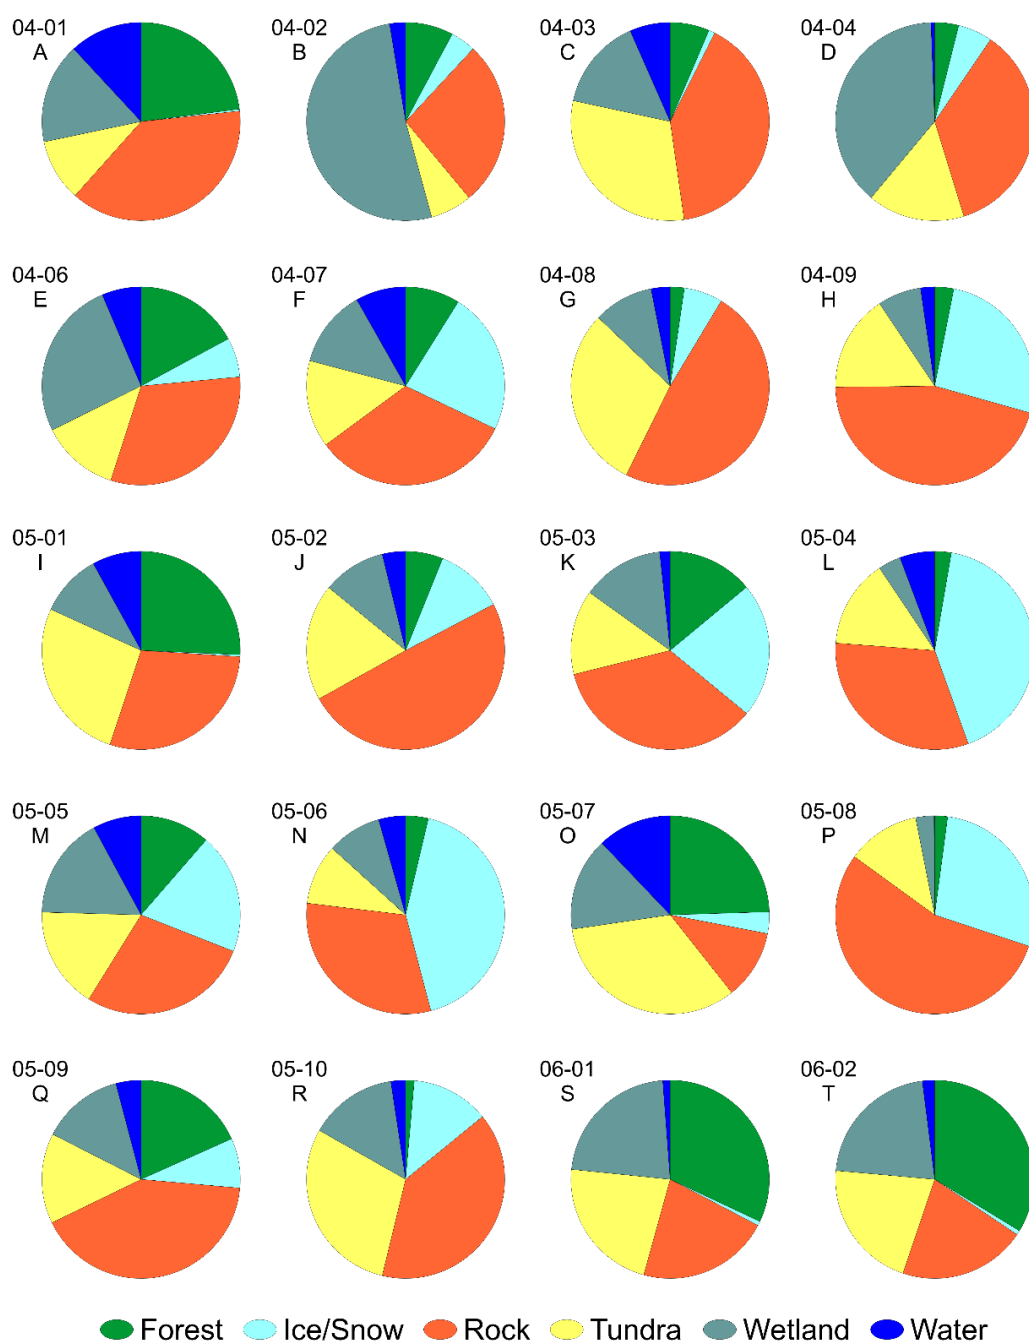

**Figure DR1.** Distribution of land-cover types in the watersheds surrounding the cored lakes calculated from Landsat imagery through supervised classification<sup>2</sup>. Lake names are keyed to Table 1, and letters are keyed to Figure 1.

<sup>2</sup> Munroe, J.S., 2019, Hydrogeomorphic controls on Holocene lacustrine loss-on-ignition records: *Journal of Paleolimnology*, v. 61, p. 53–68.

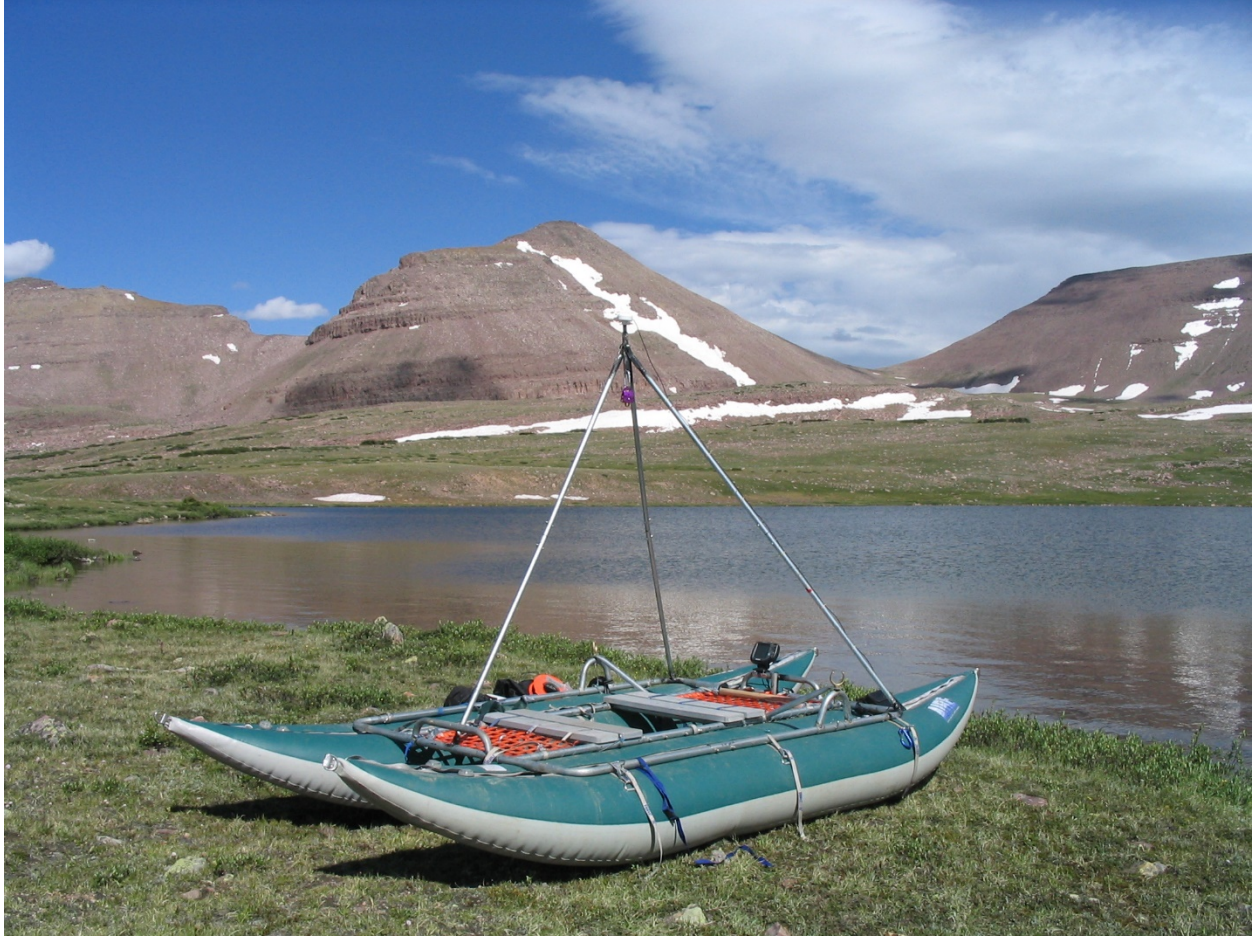

**Figure DR2.** The coring platform on the shore of North Star Lake (04-09, H) in July, 2004. The platform, which was specifically designed for this project, disassembles to individual components sized for transport by pack animal, and supports a crew of 3 people. Note the GPS antennae on top of the tripod, which is linked to the digital depth finder.

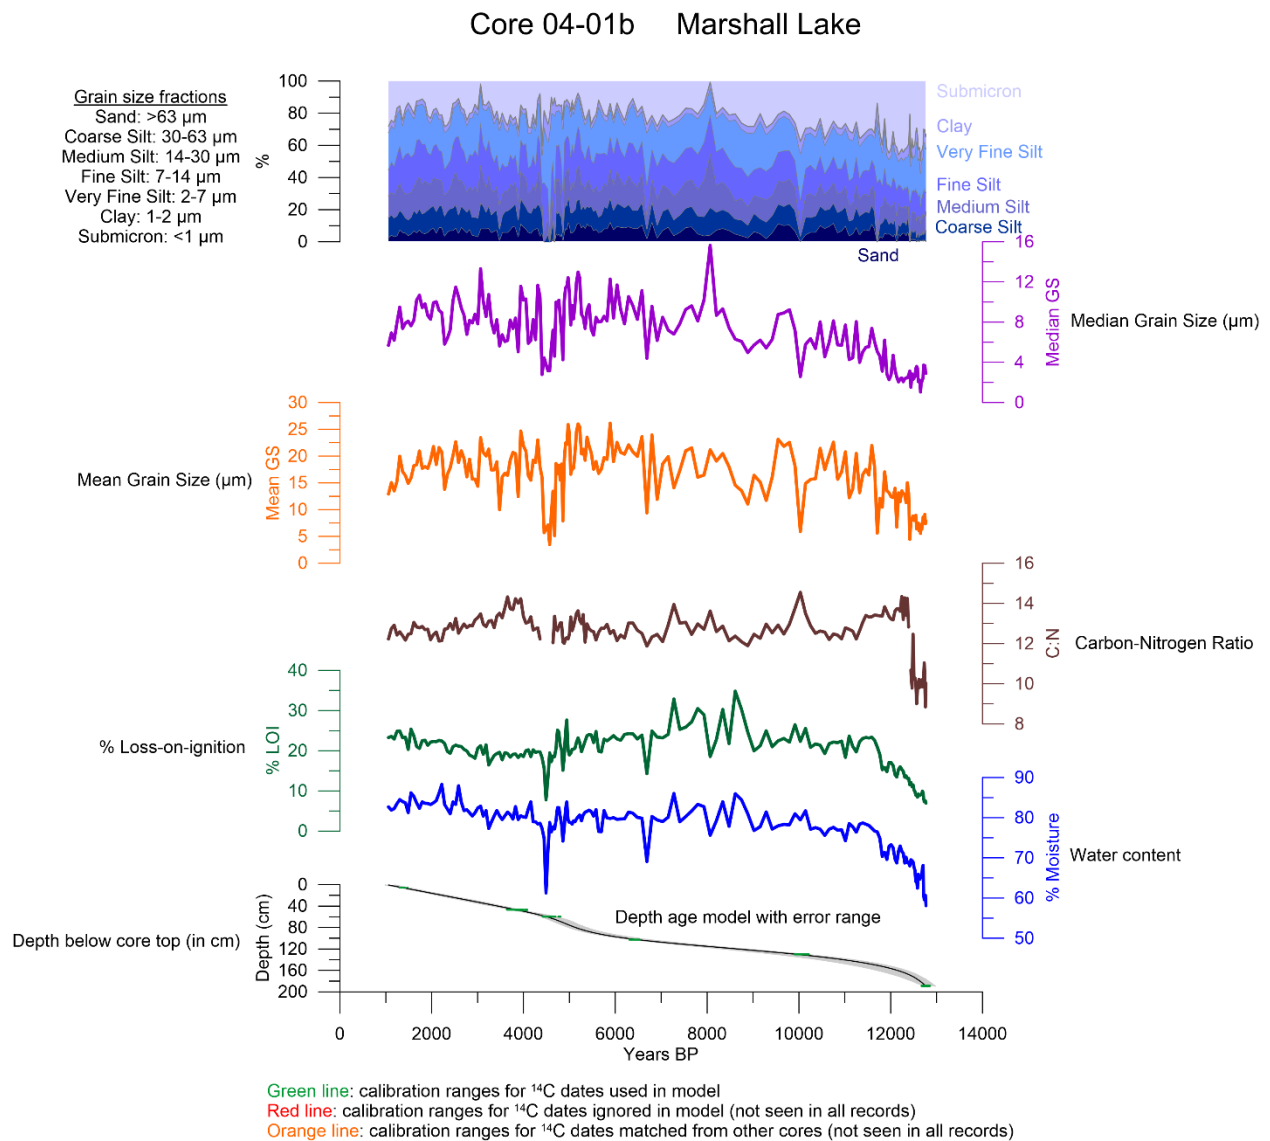

**Figure DR3.** Annotated standard template for presenting the multiproxy records from the Uinta lake cores in the following figures.



# Core 04-01b    Marshall Lake (A)

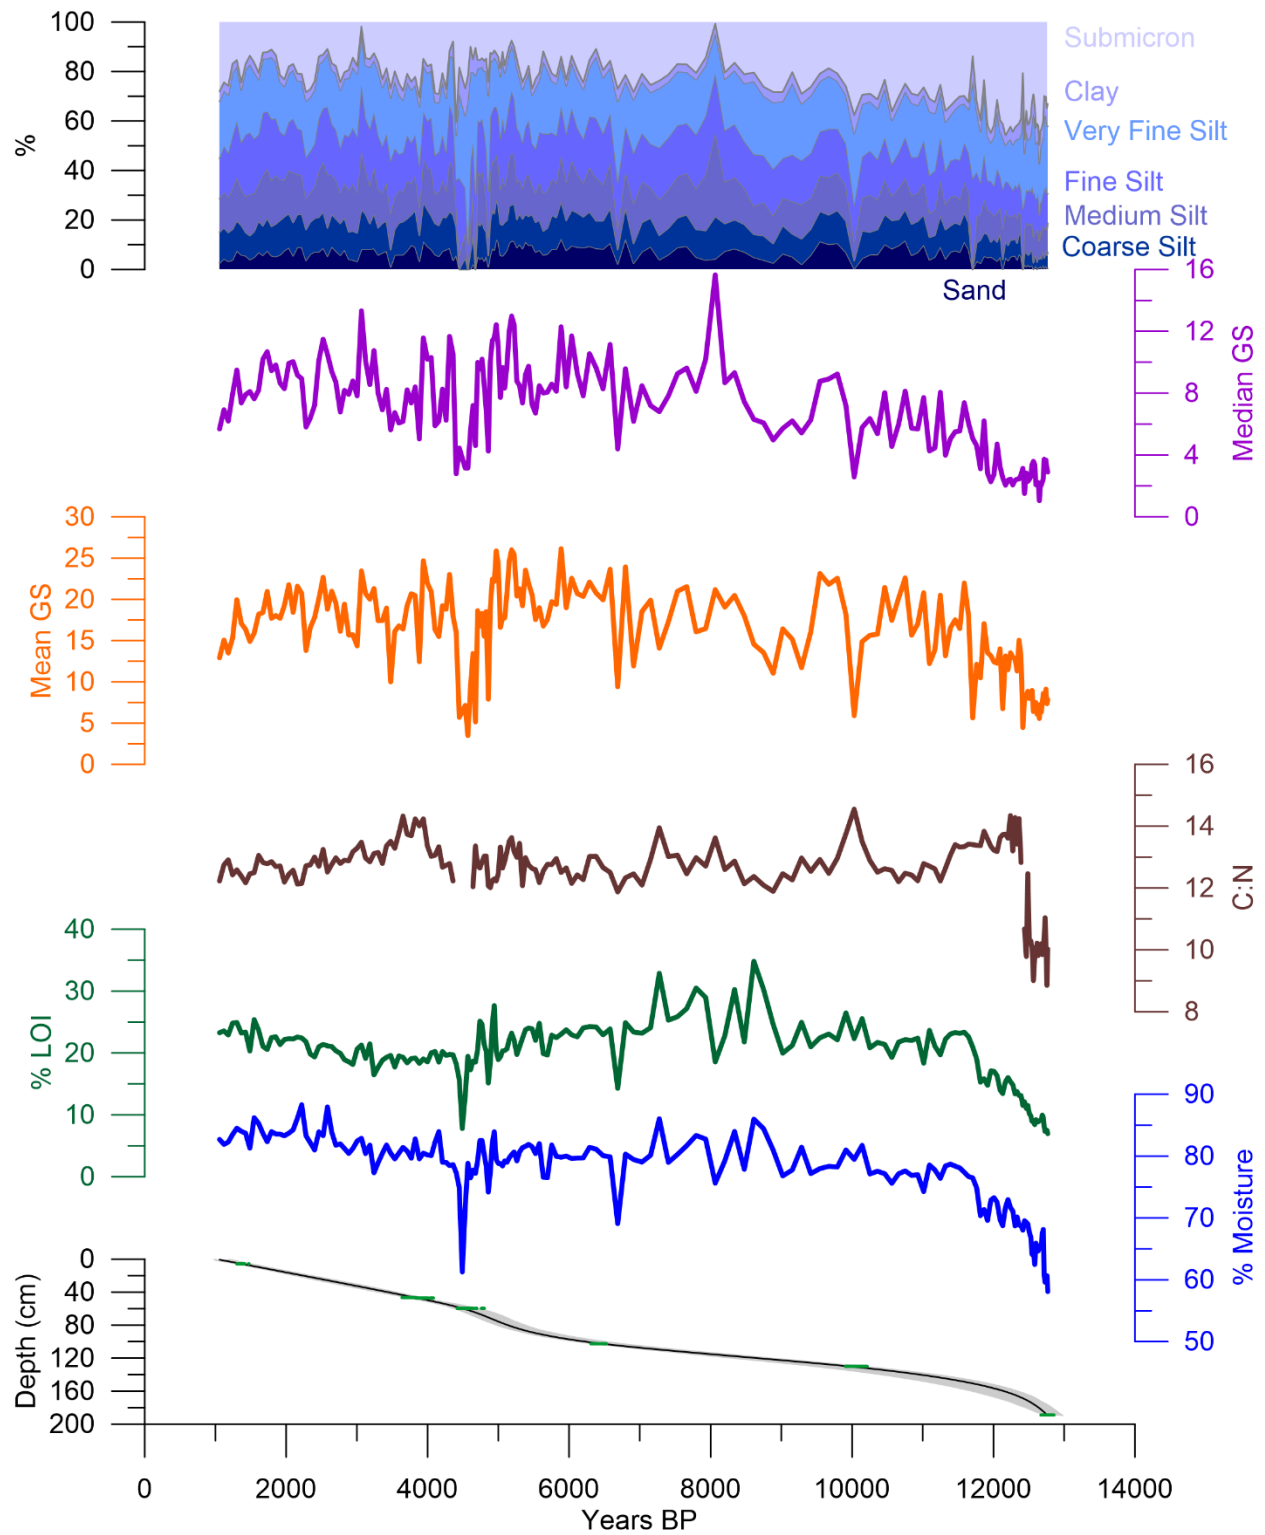

Figure DR4

# Core 04-02a Hoover Lake (B)

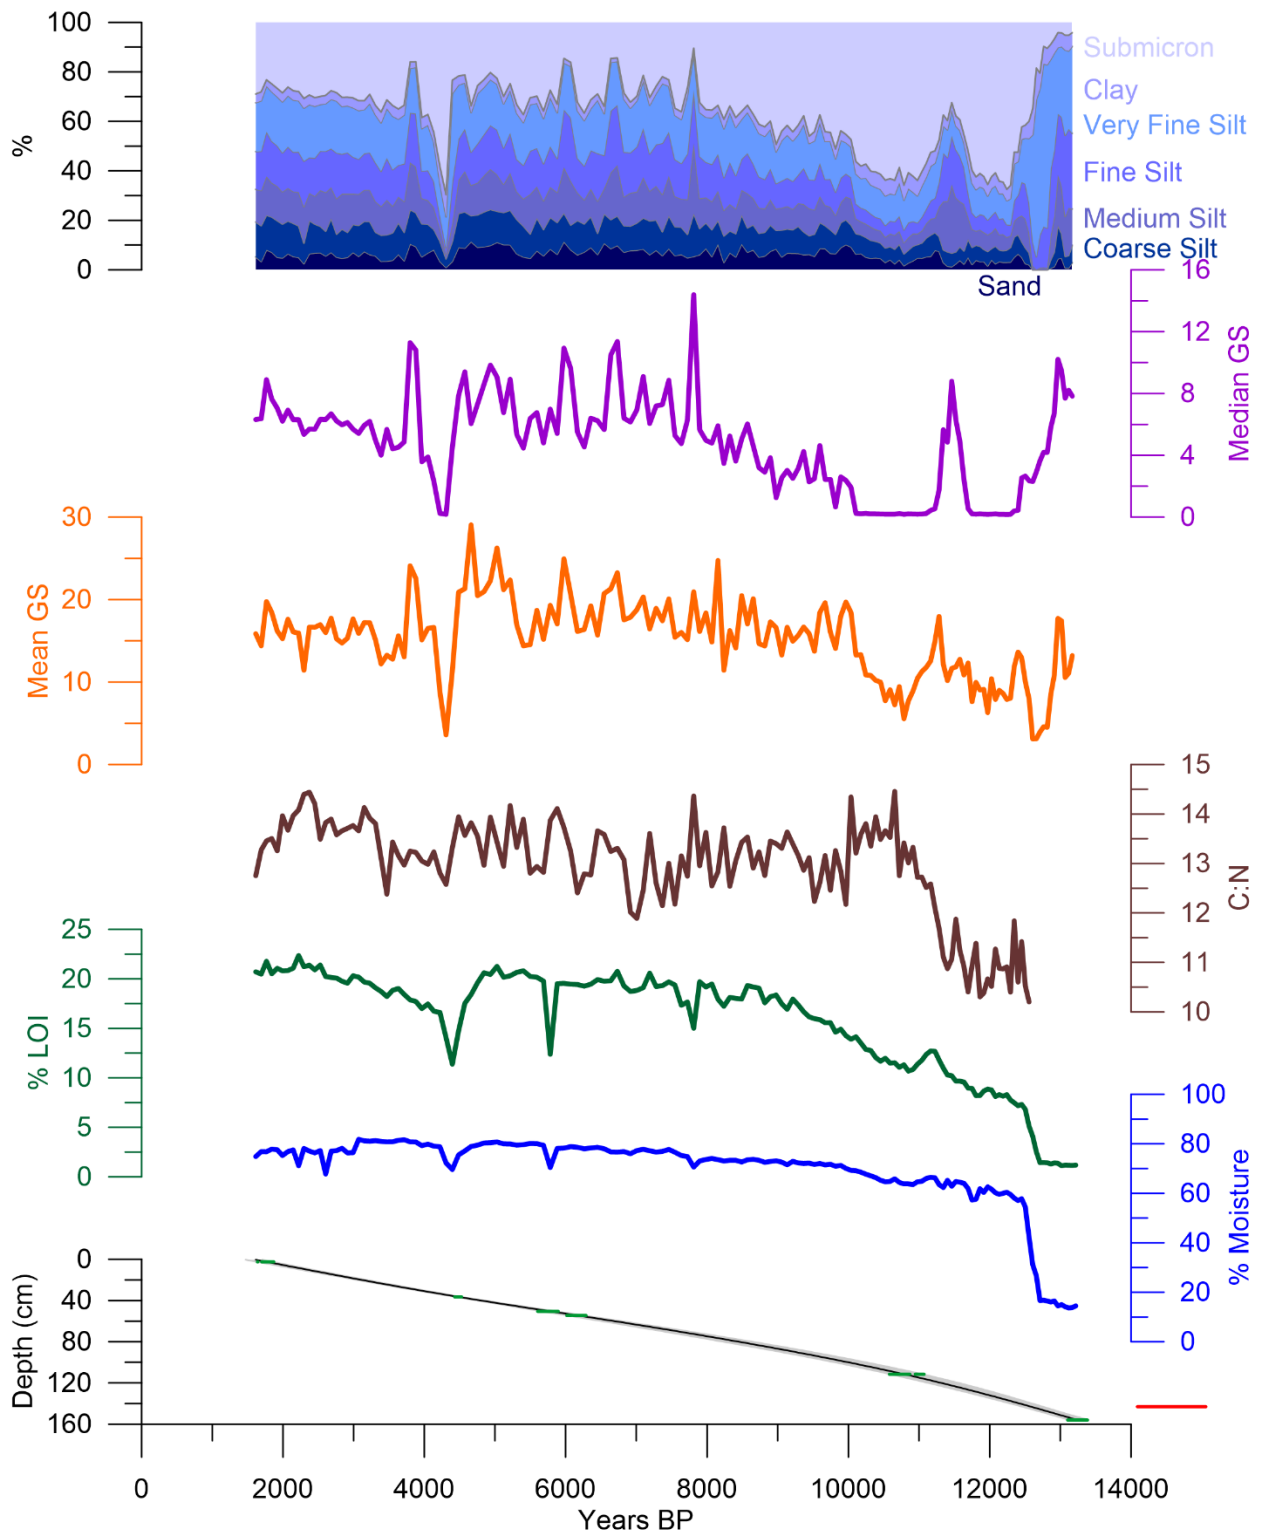

Figure DR5

# Core 04-03 Pyramid Lake (C)

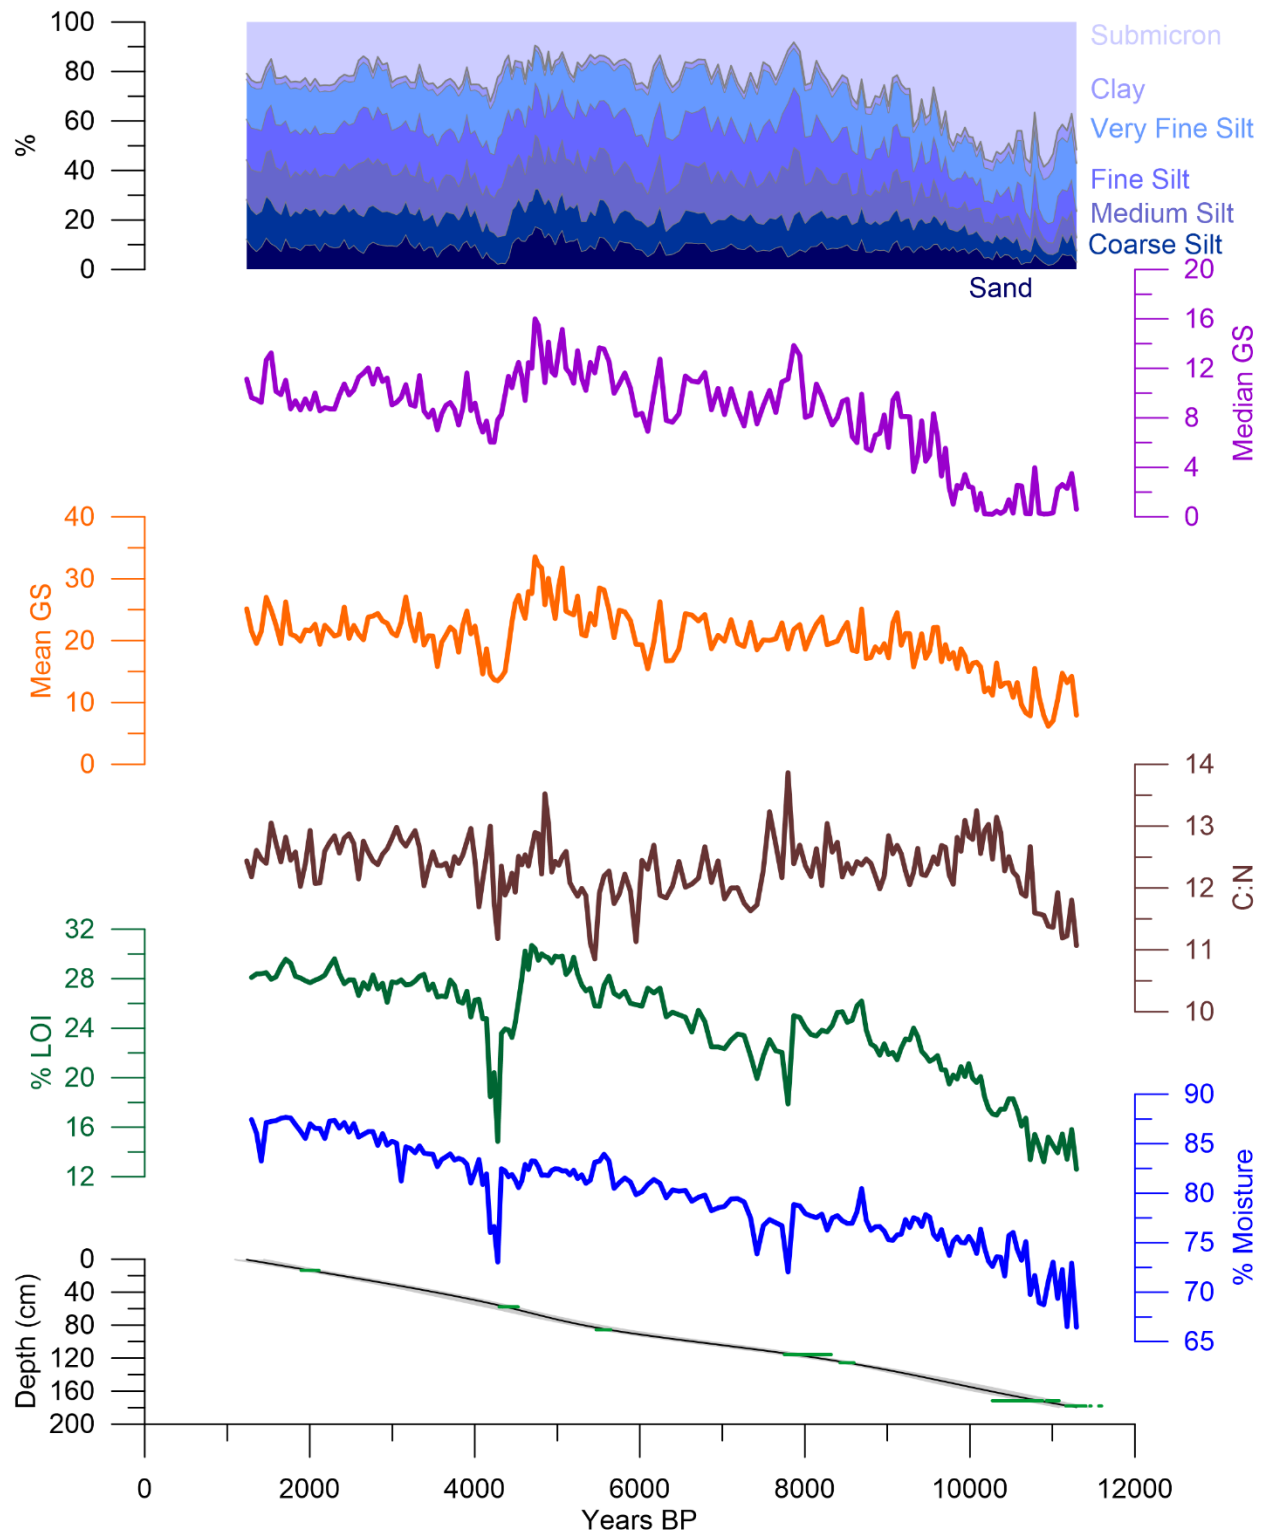

Figure DR6

Core 04-04 Elbow Lake (D)

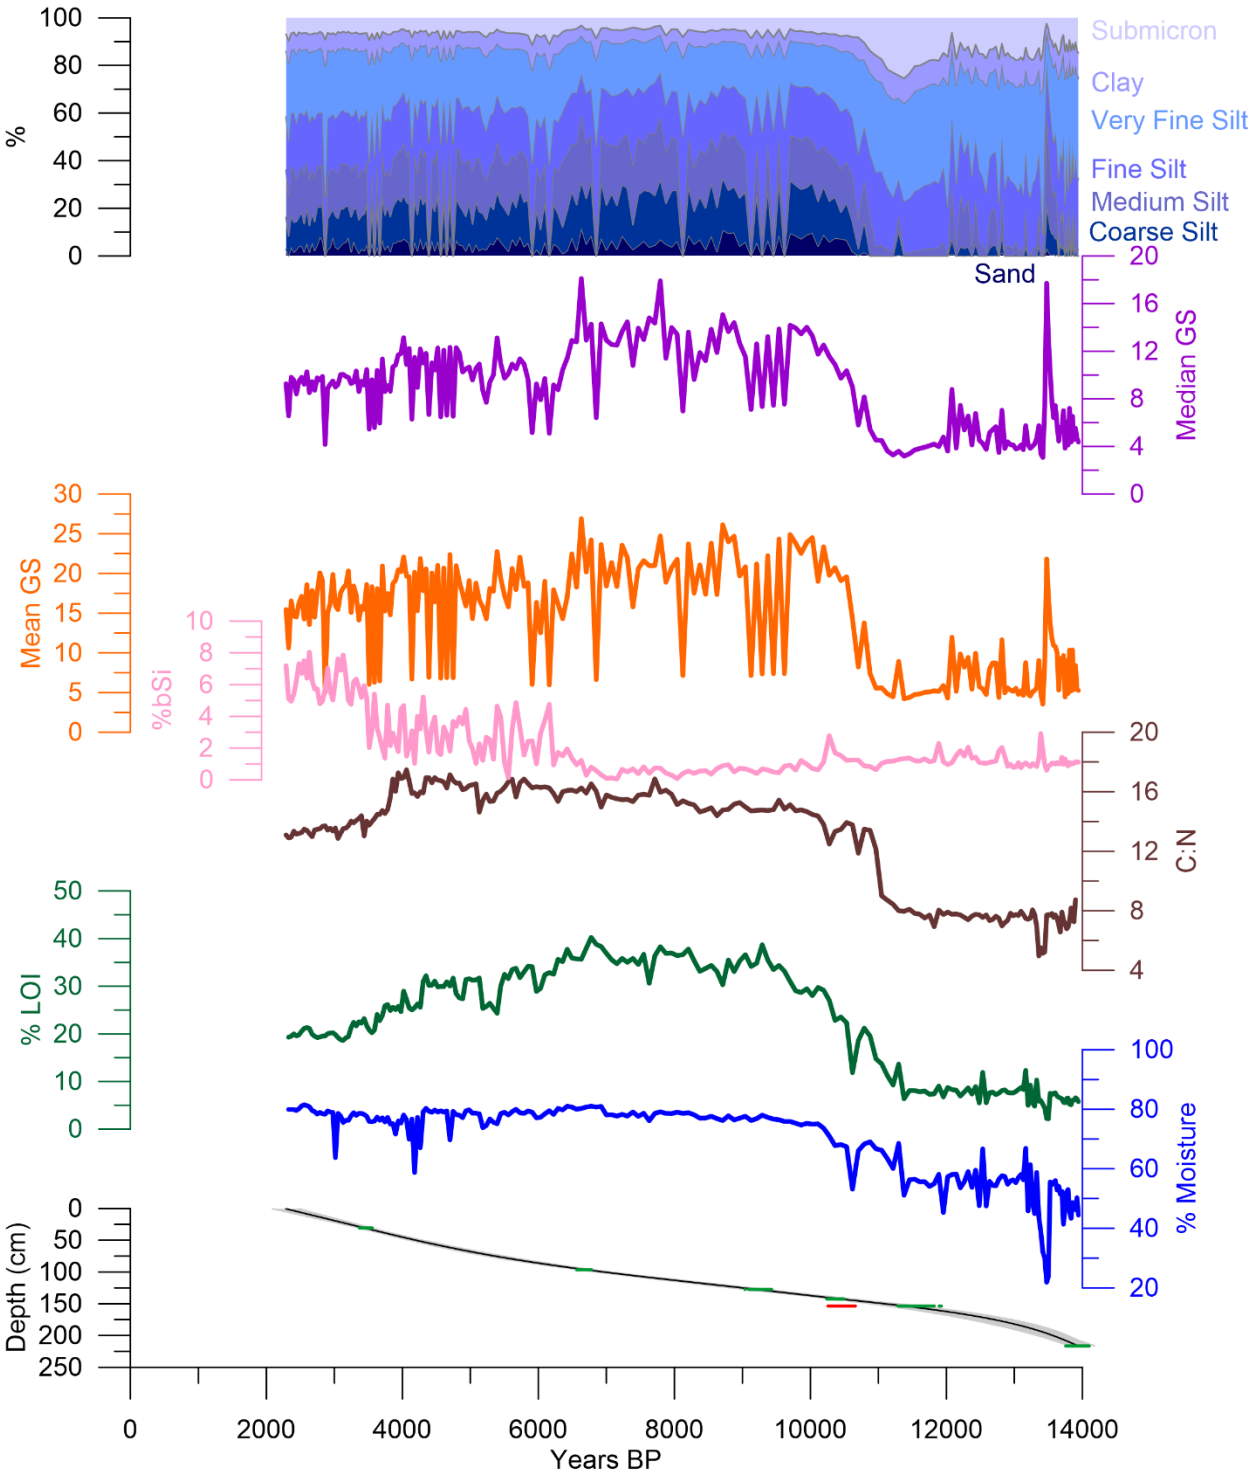

Figure DR7

# Core 04-06 Swasey Lake (E)

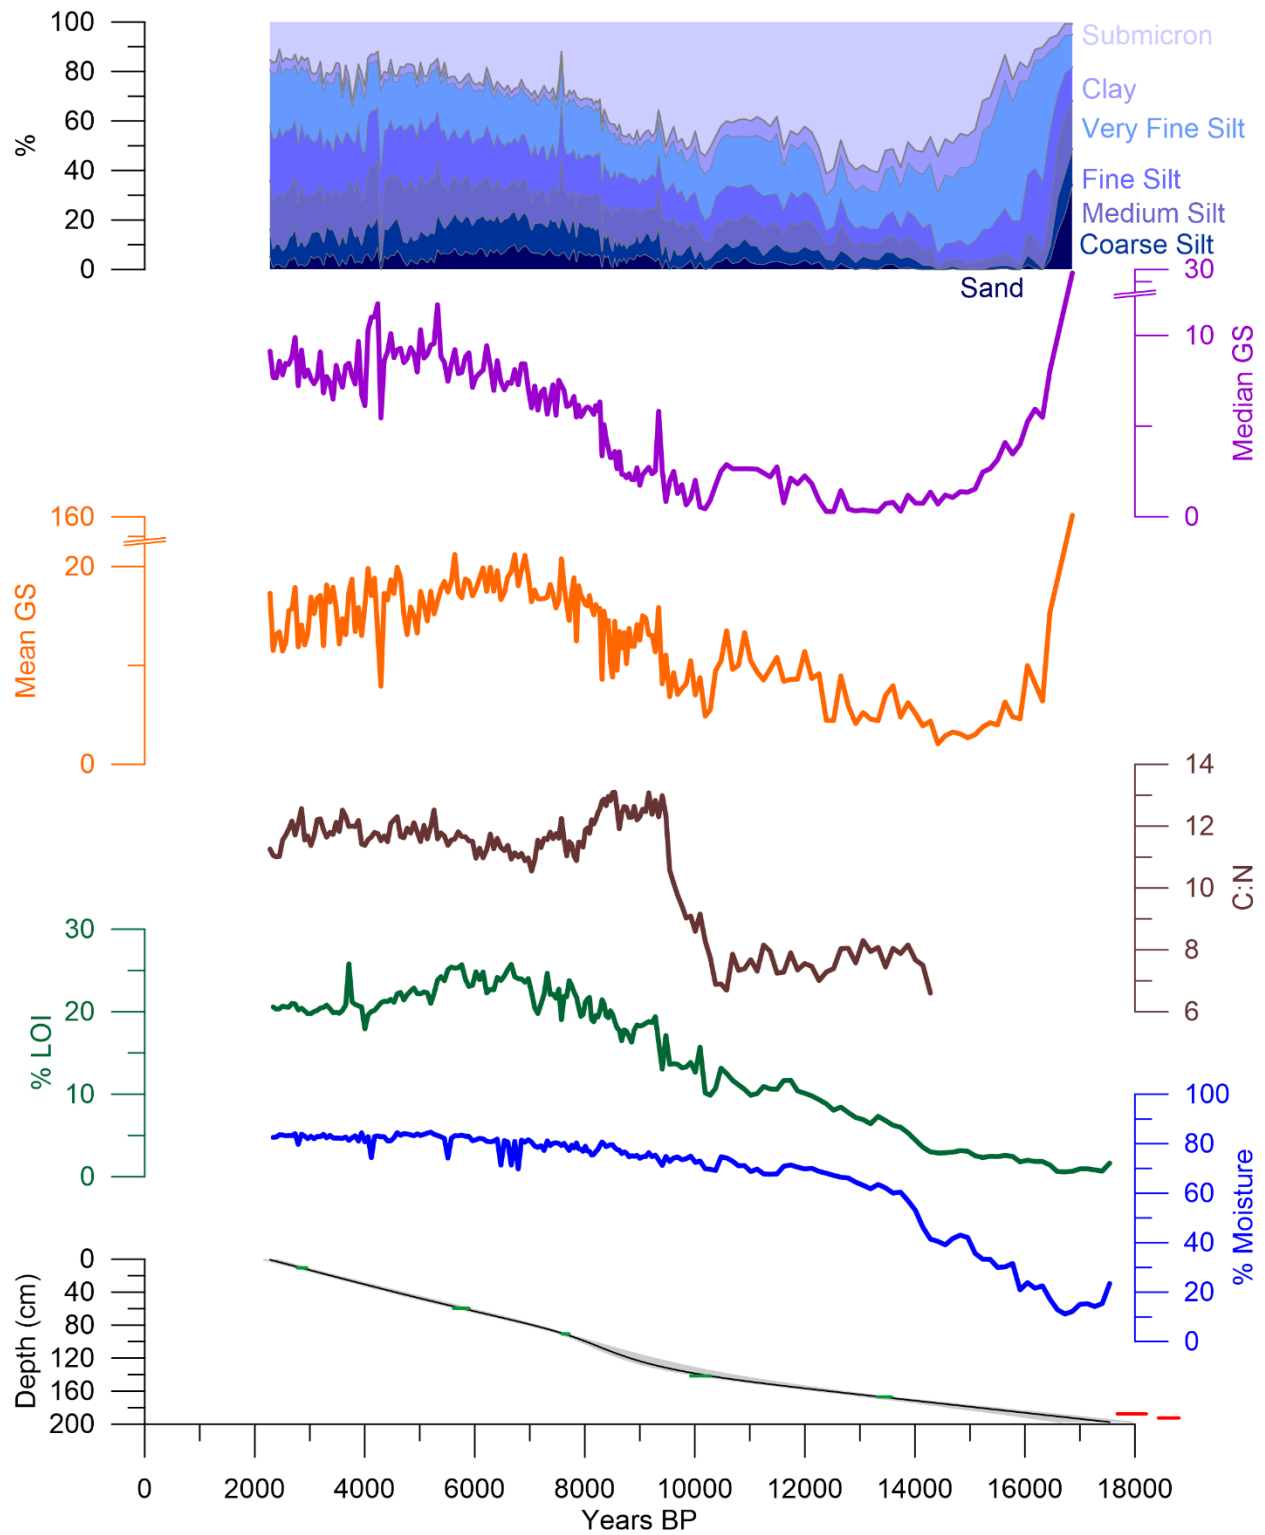

Figure DR8



# Core 04-07 Spider Lake (F)

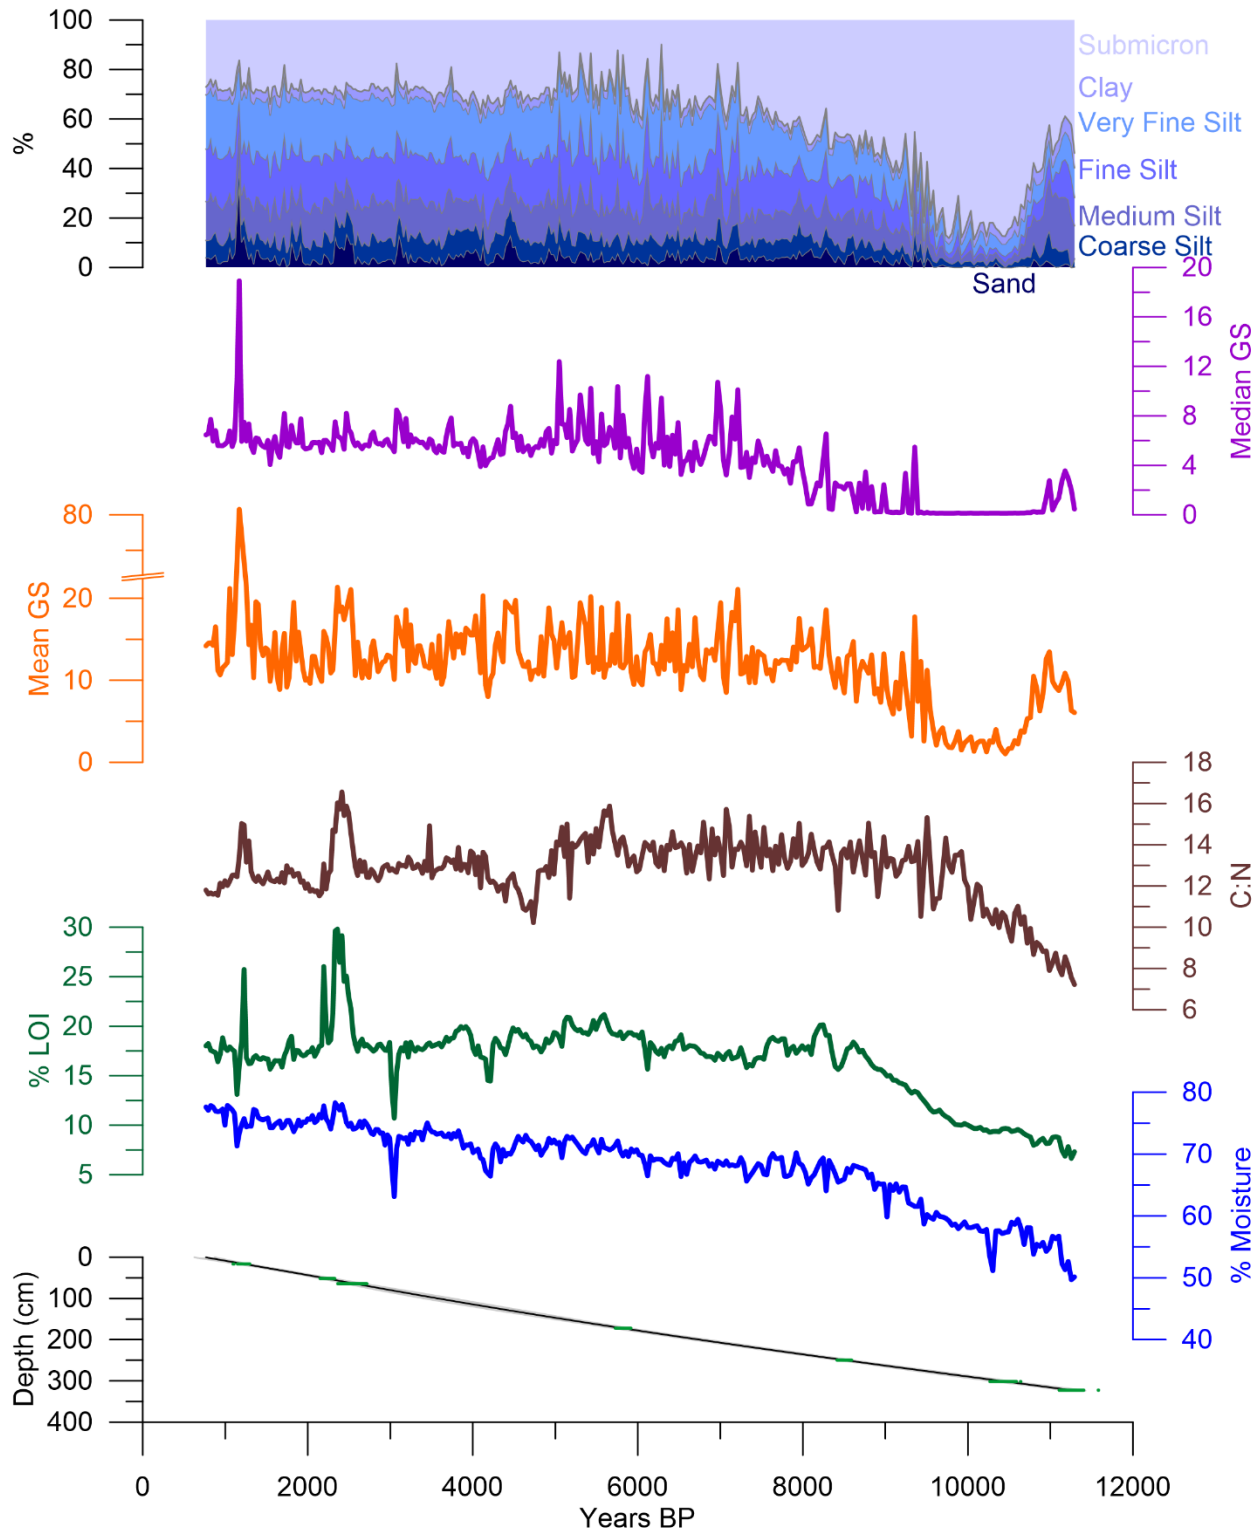

Figure DR9

# Core 04-08 Little Superior Lake (G)

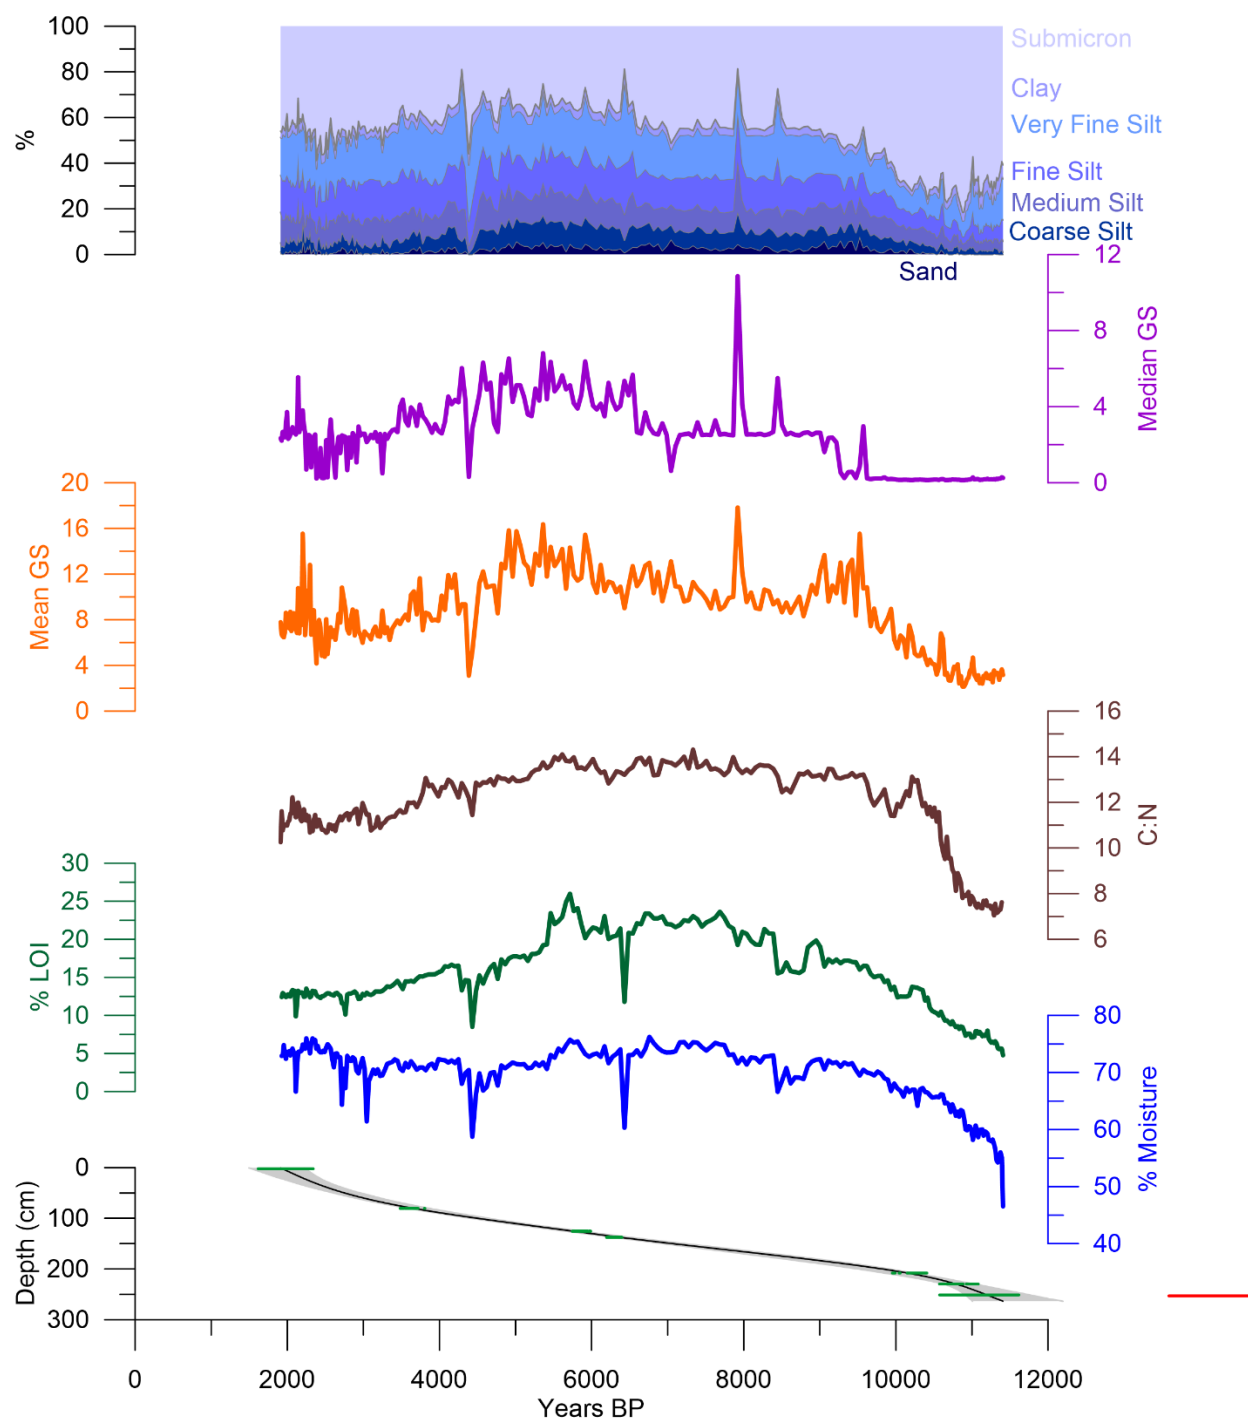

Figure DR10

# Core 04-09 North Star Lake (H)

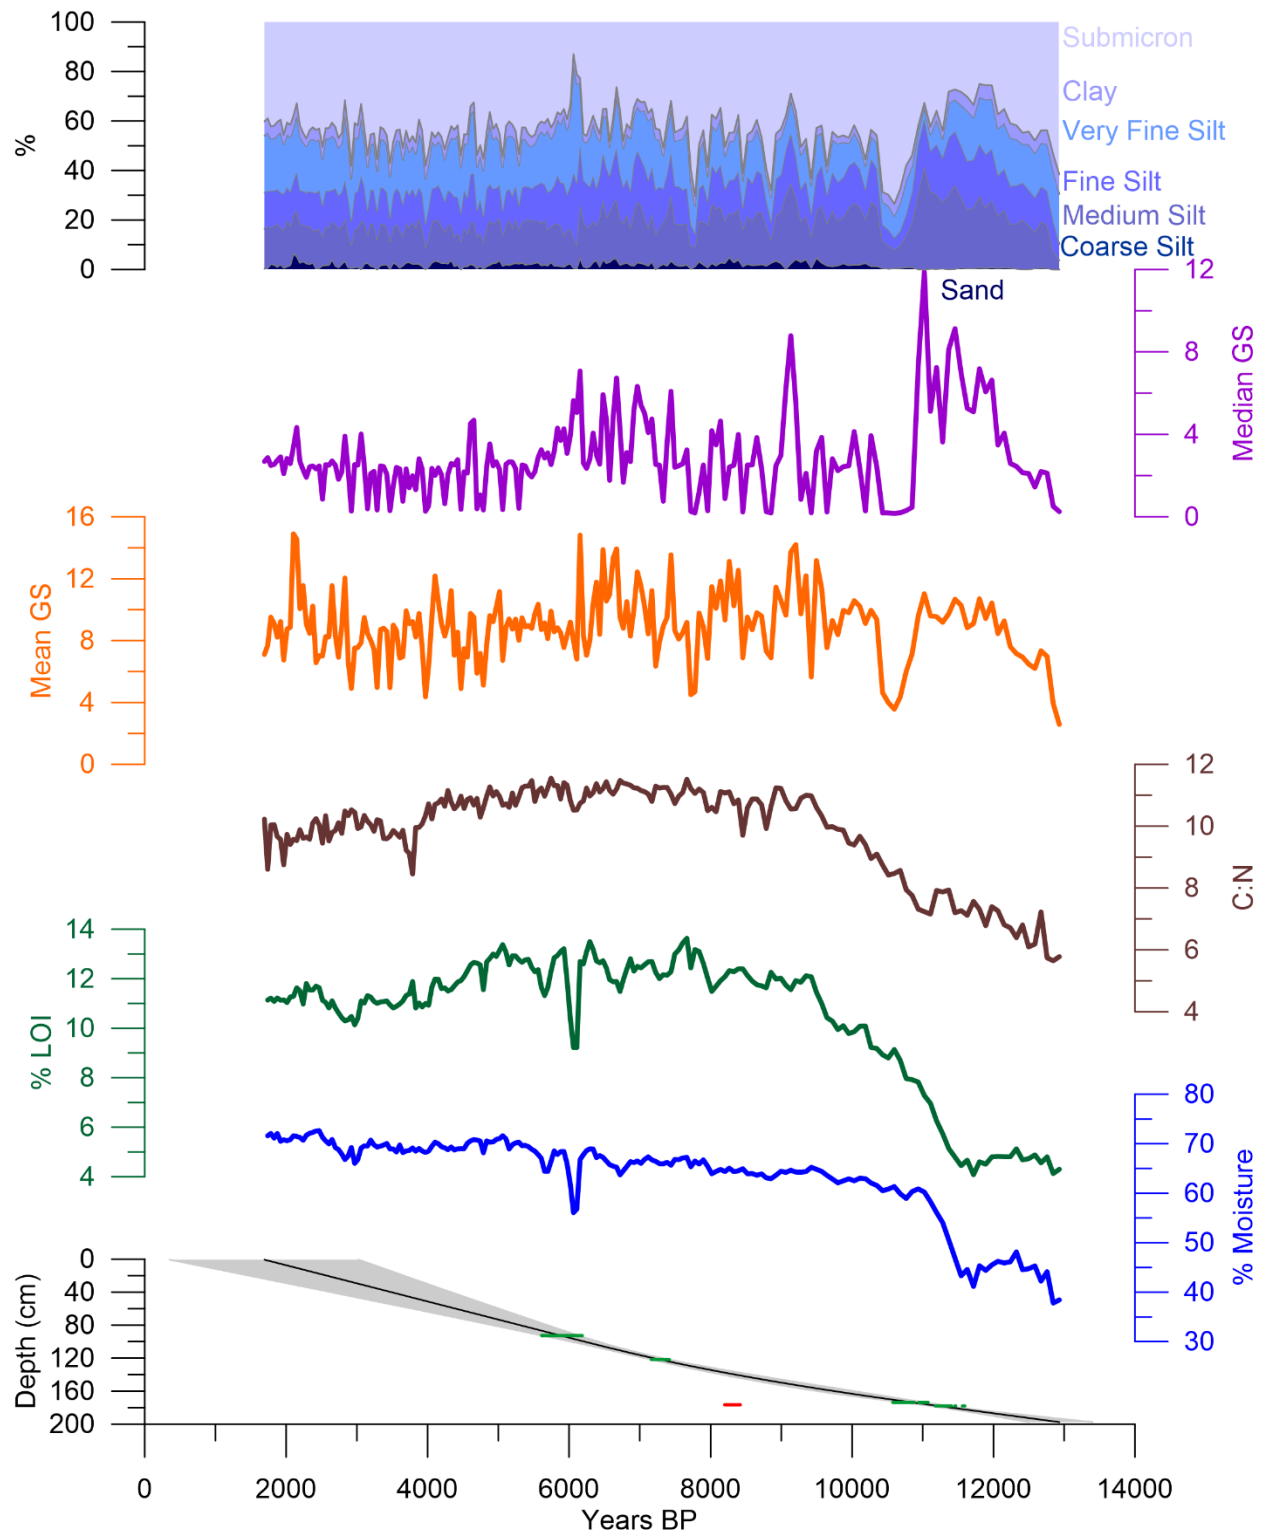

Figure DR11

# Core 05-01 Reader Lake (I)

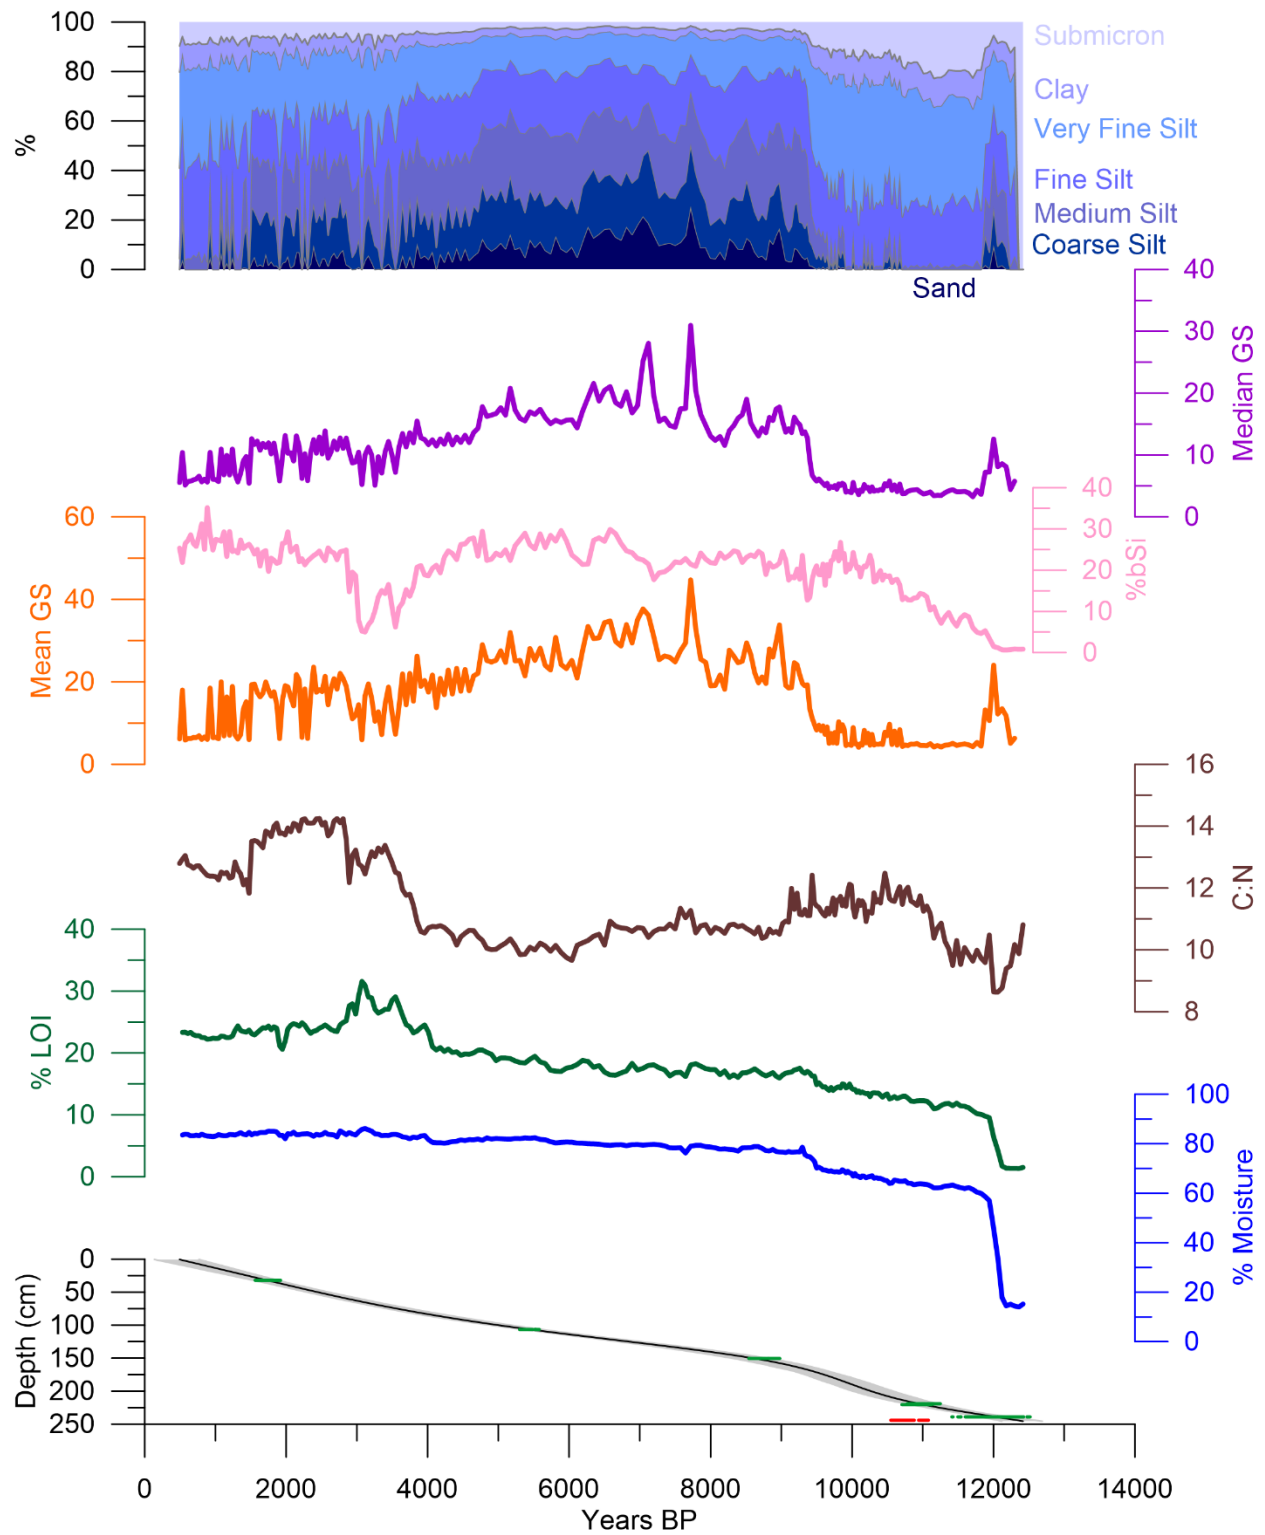

Figure DR12

# Core 05-02 Ostler Lake (J)

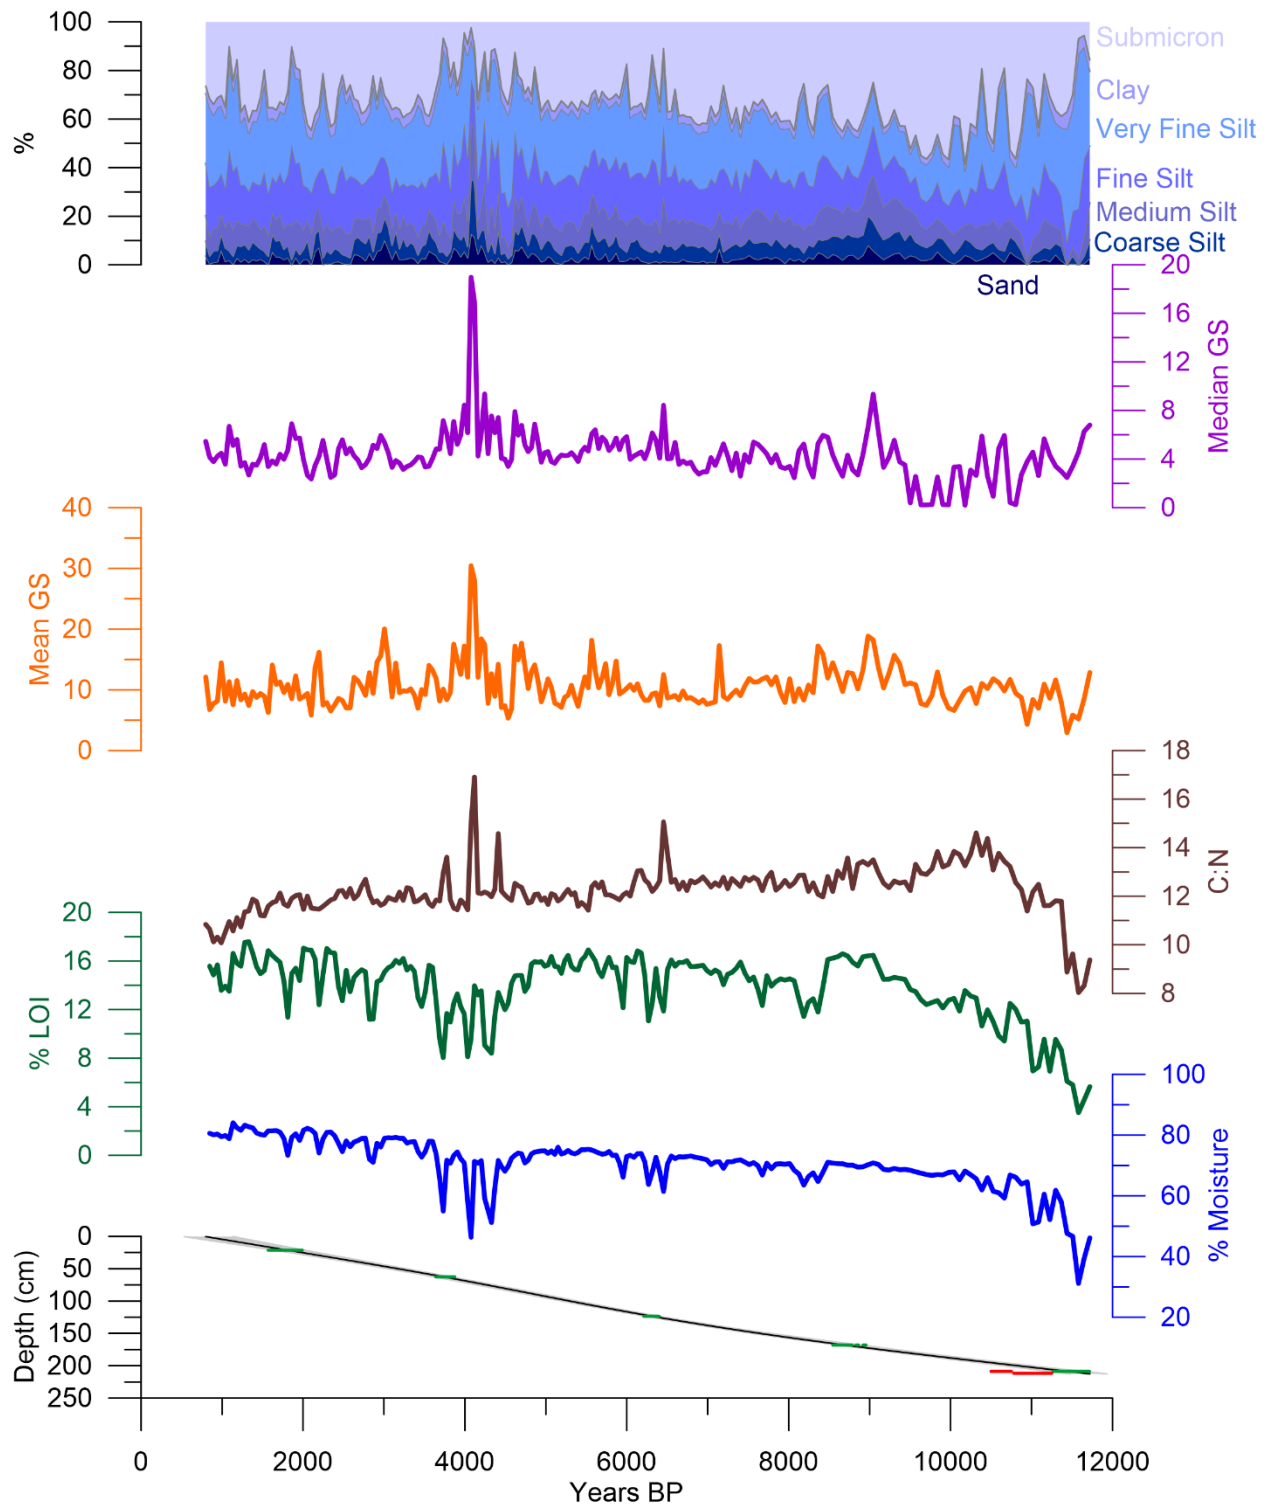

Figure DR13



# Core 05-03 Kermisuh Lake (K)

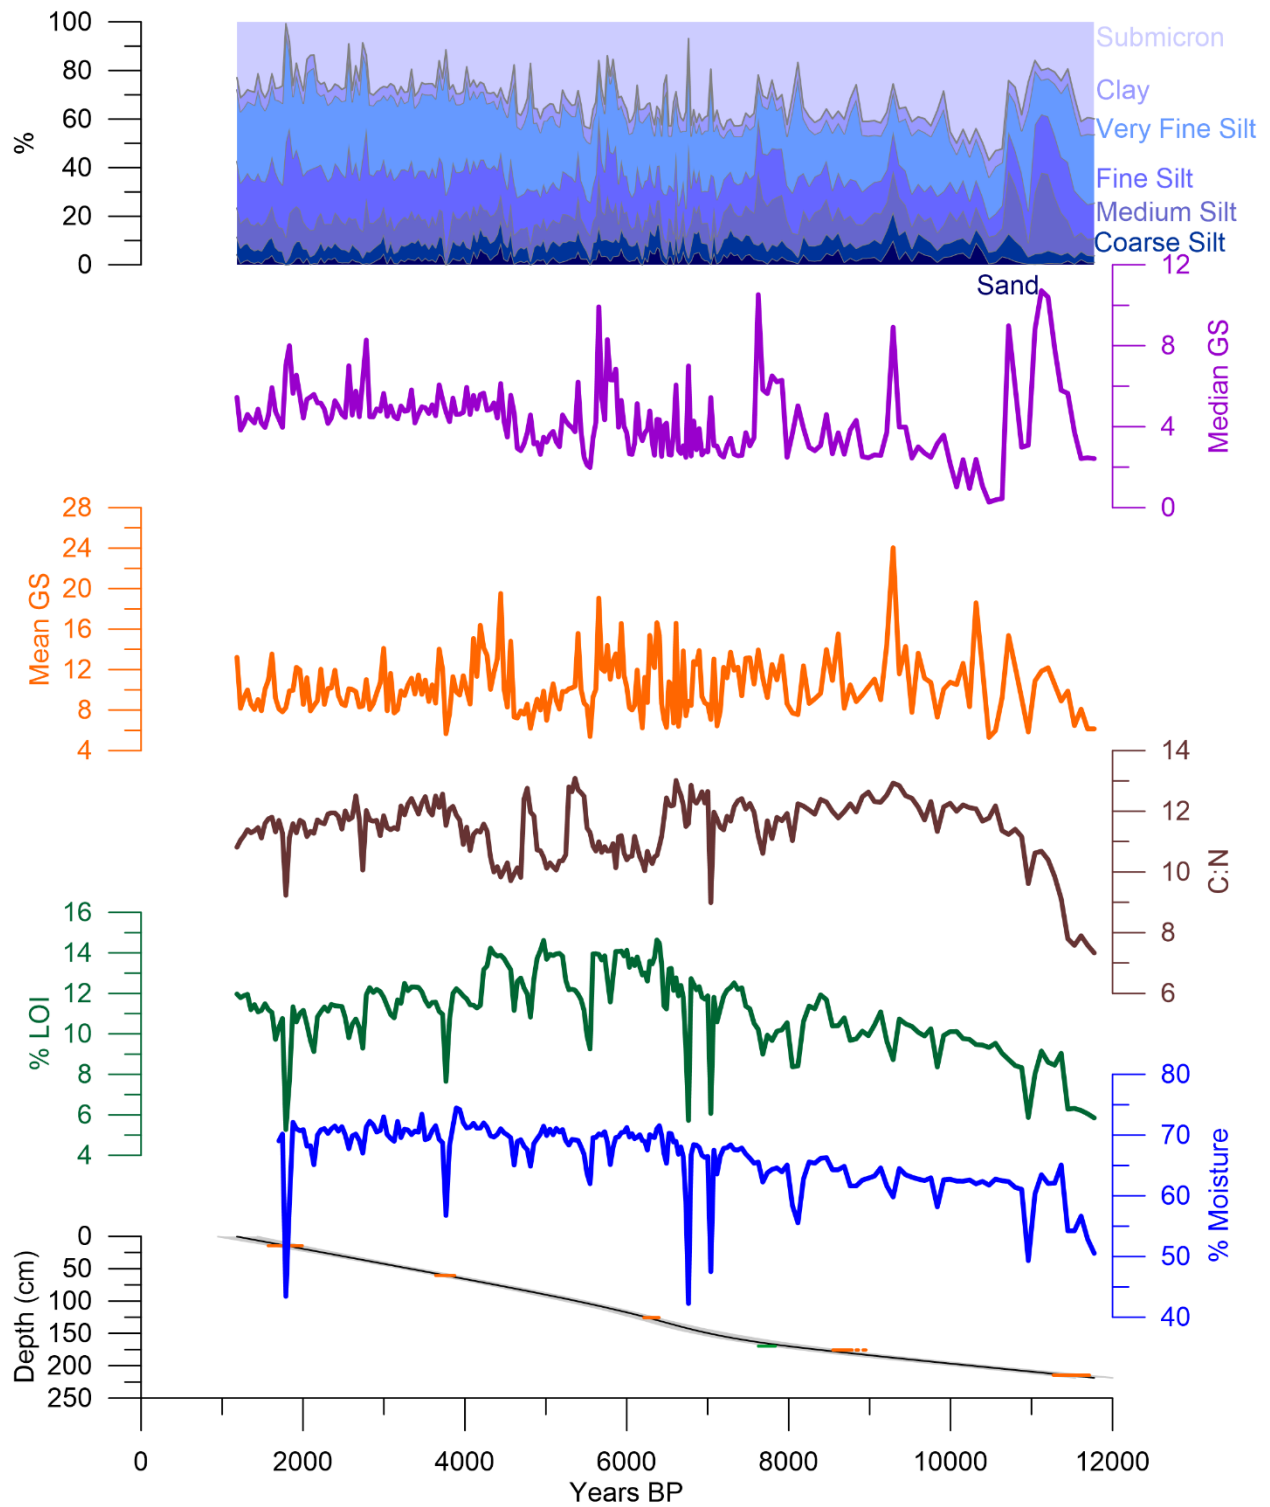

Figure DR14

# Core 05-04 Ryder Lake (L)

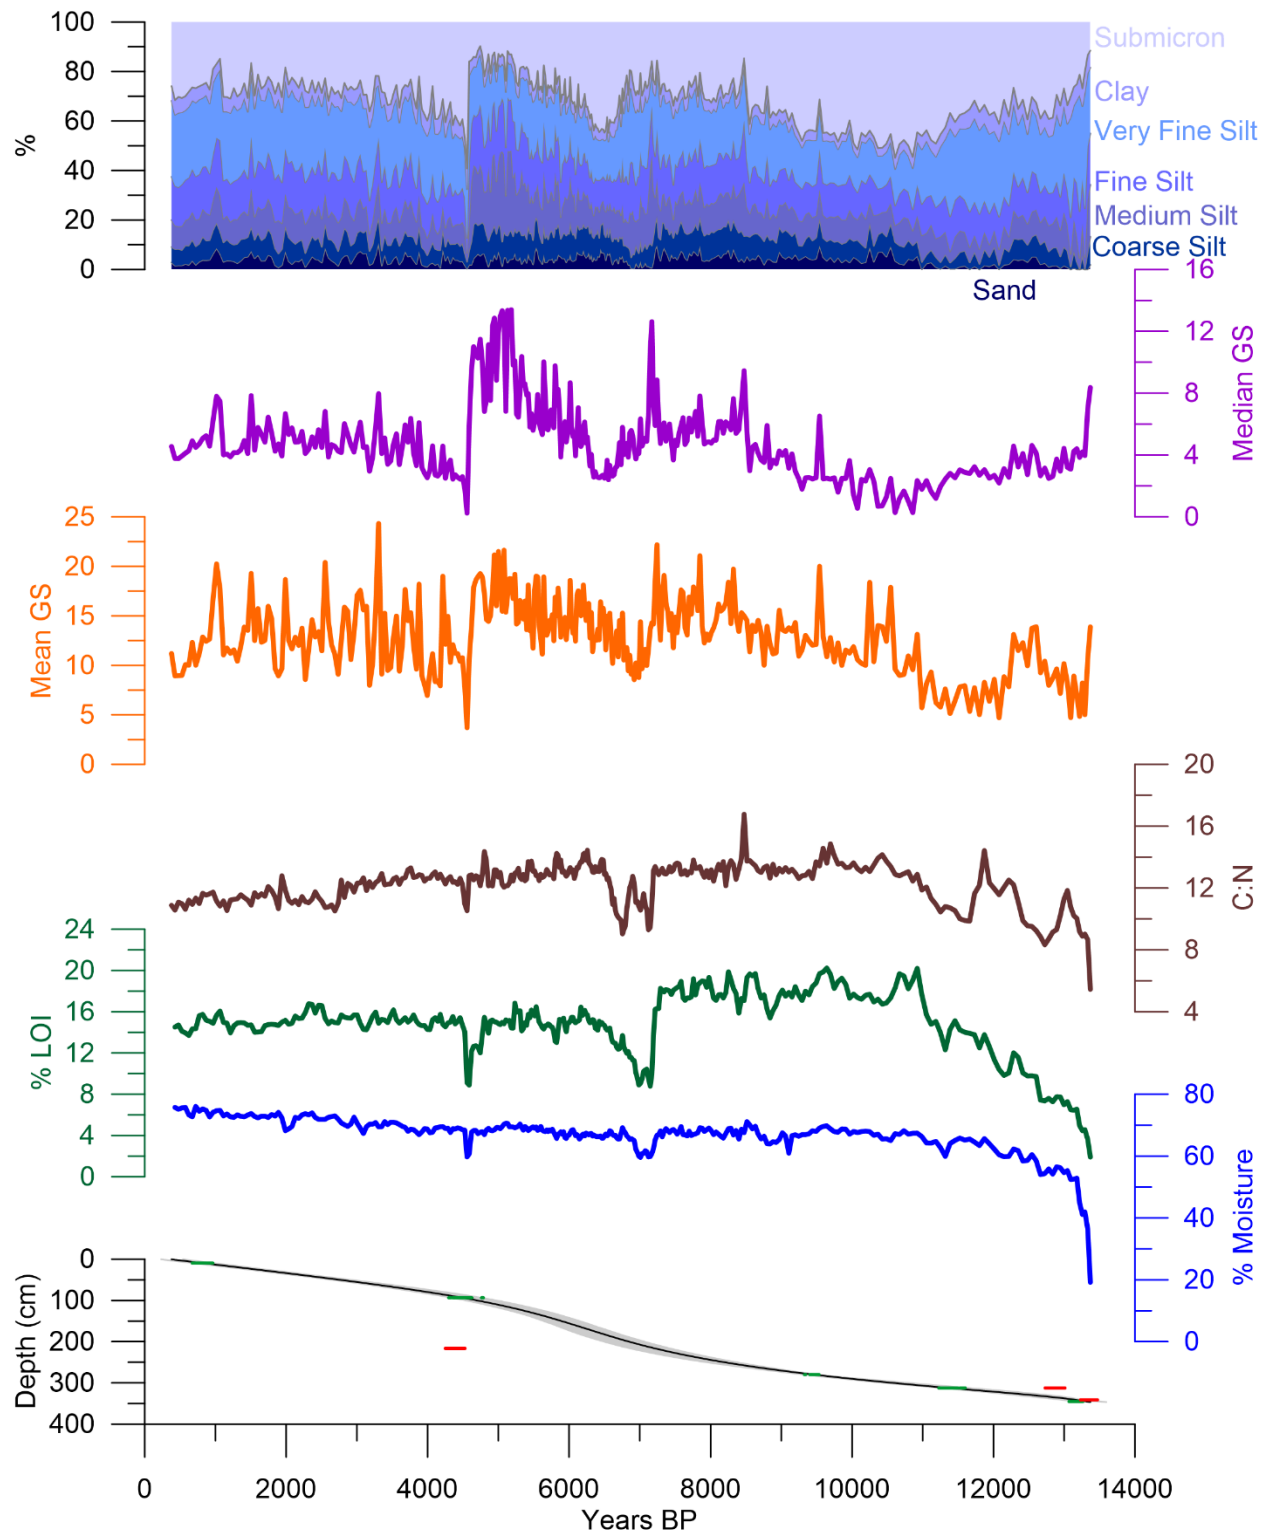

Figure DR15

# Core 05-05 Lower Red Castle Lake (M)

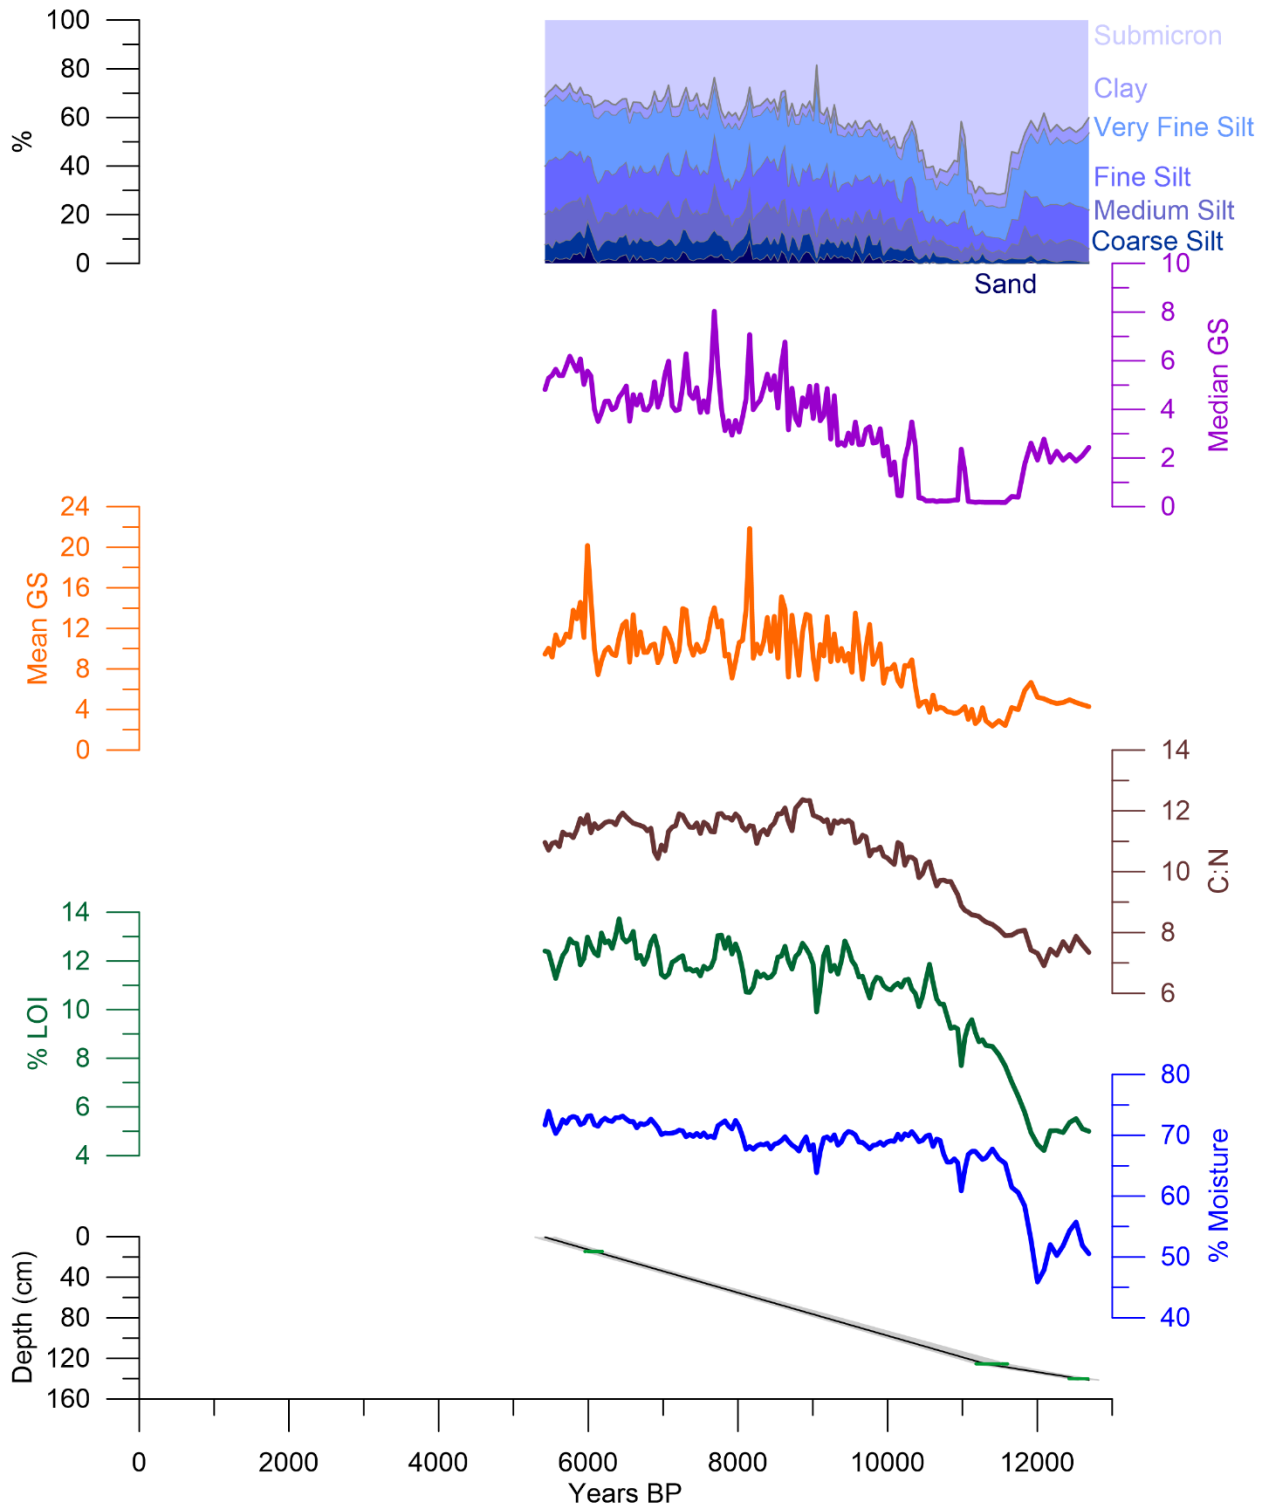

Figure DR16

# Core 05-06 Bald Lake (N)

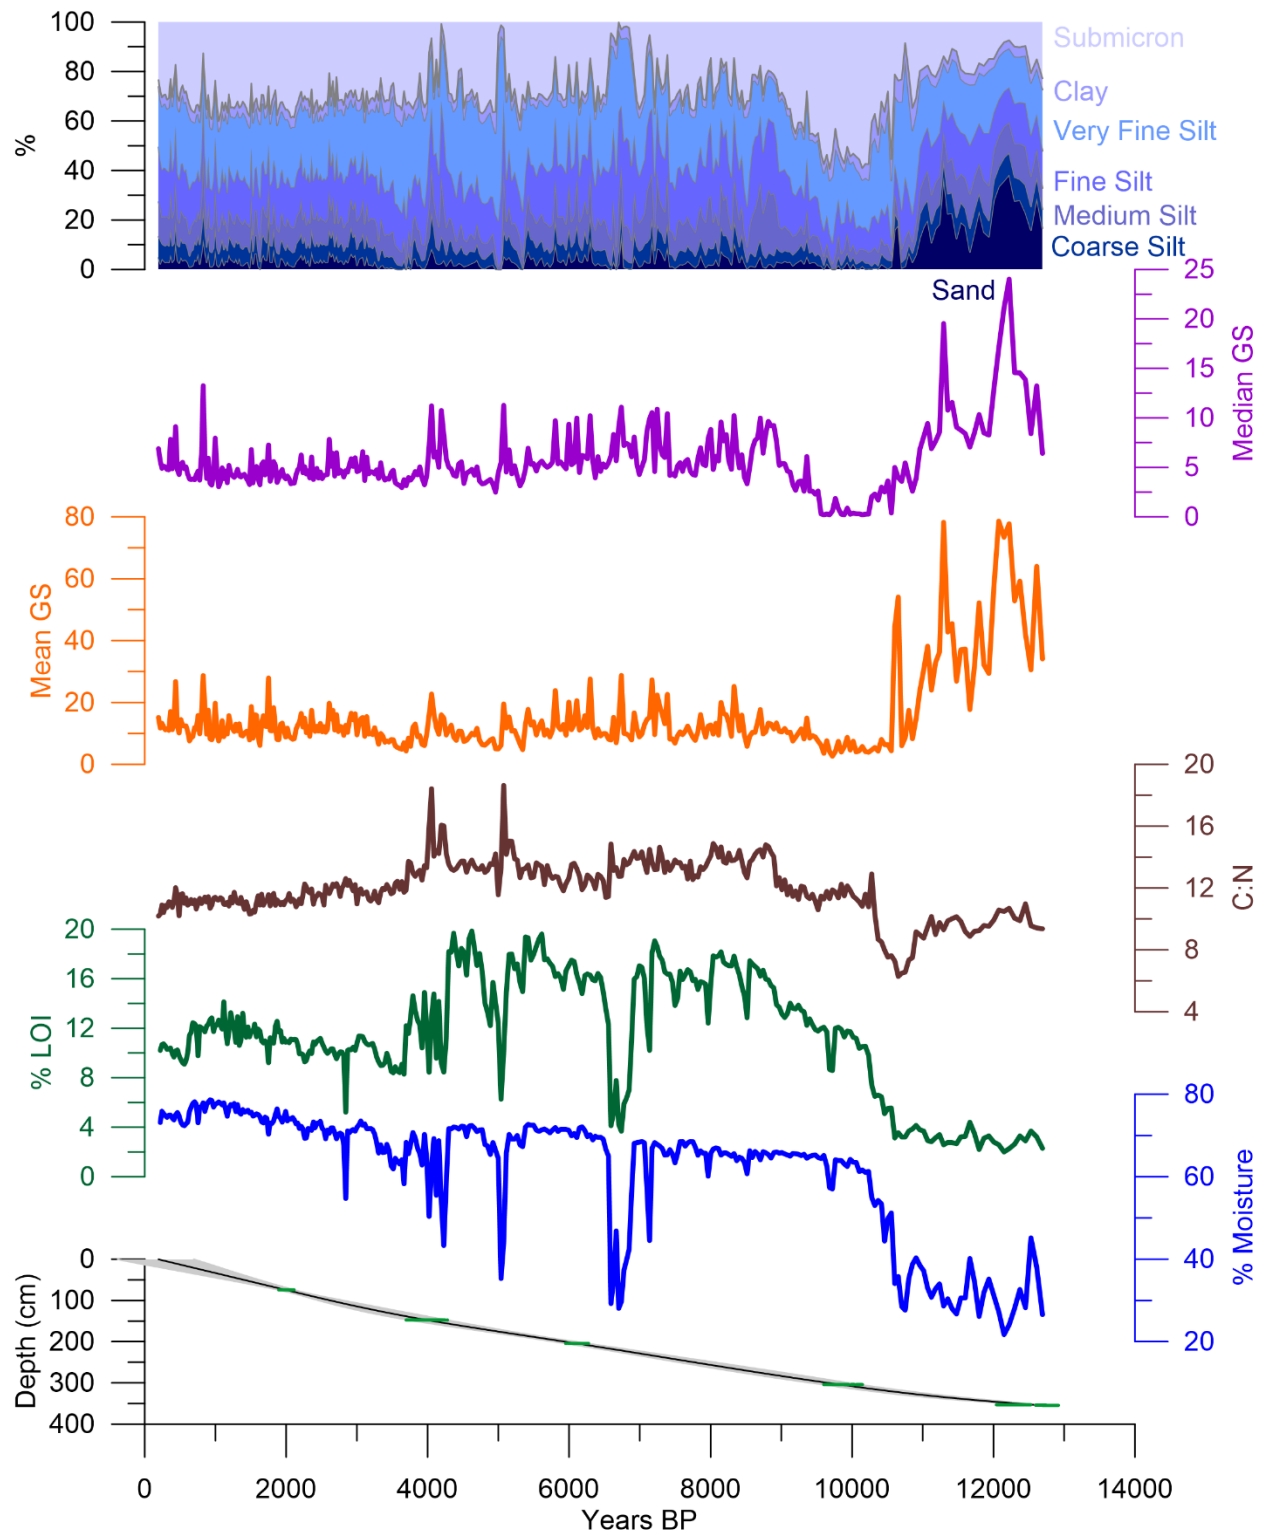

Figure DR17

# Core 05-07 Hessie Lake (O)

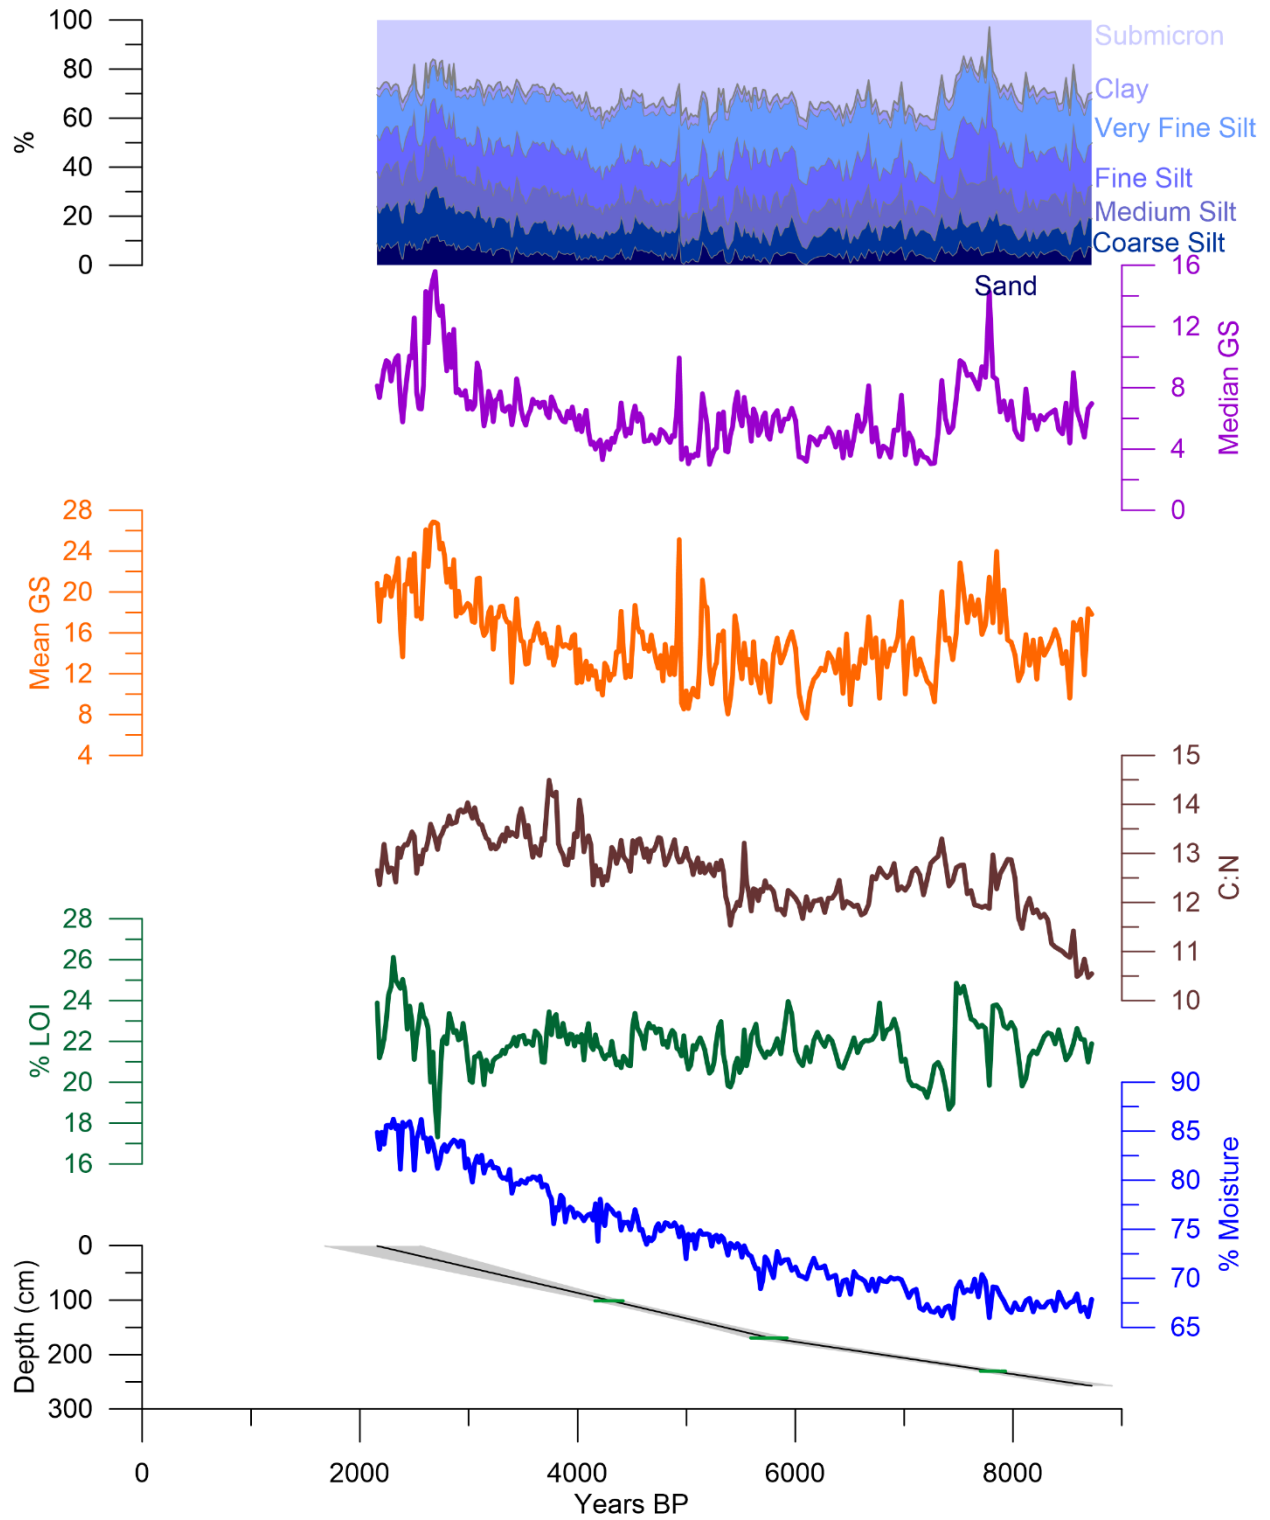

Figure DR18



## Core 05-08 Deadhorse Lake (P)

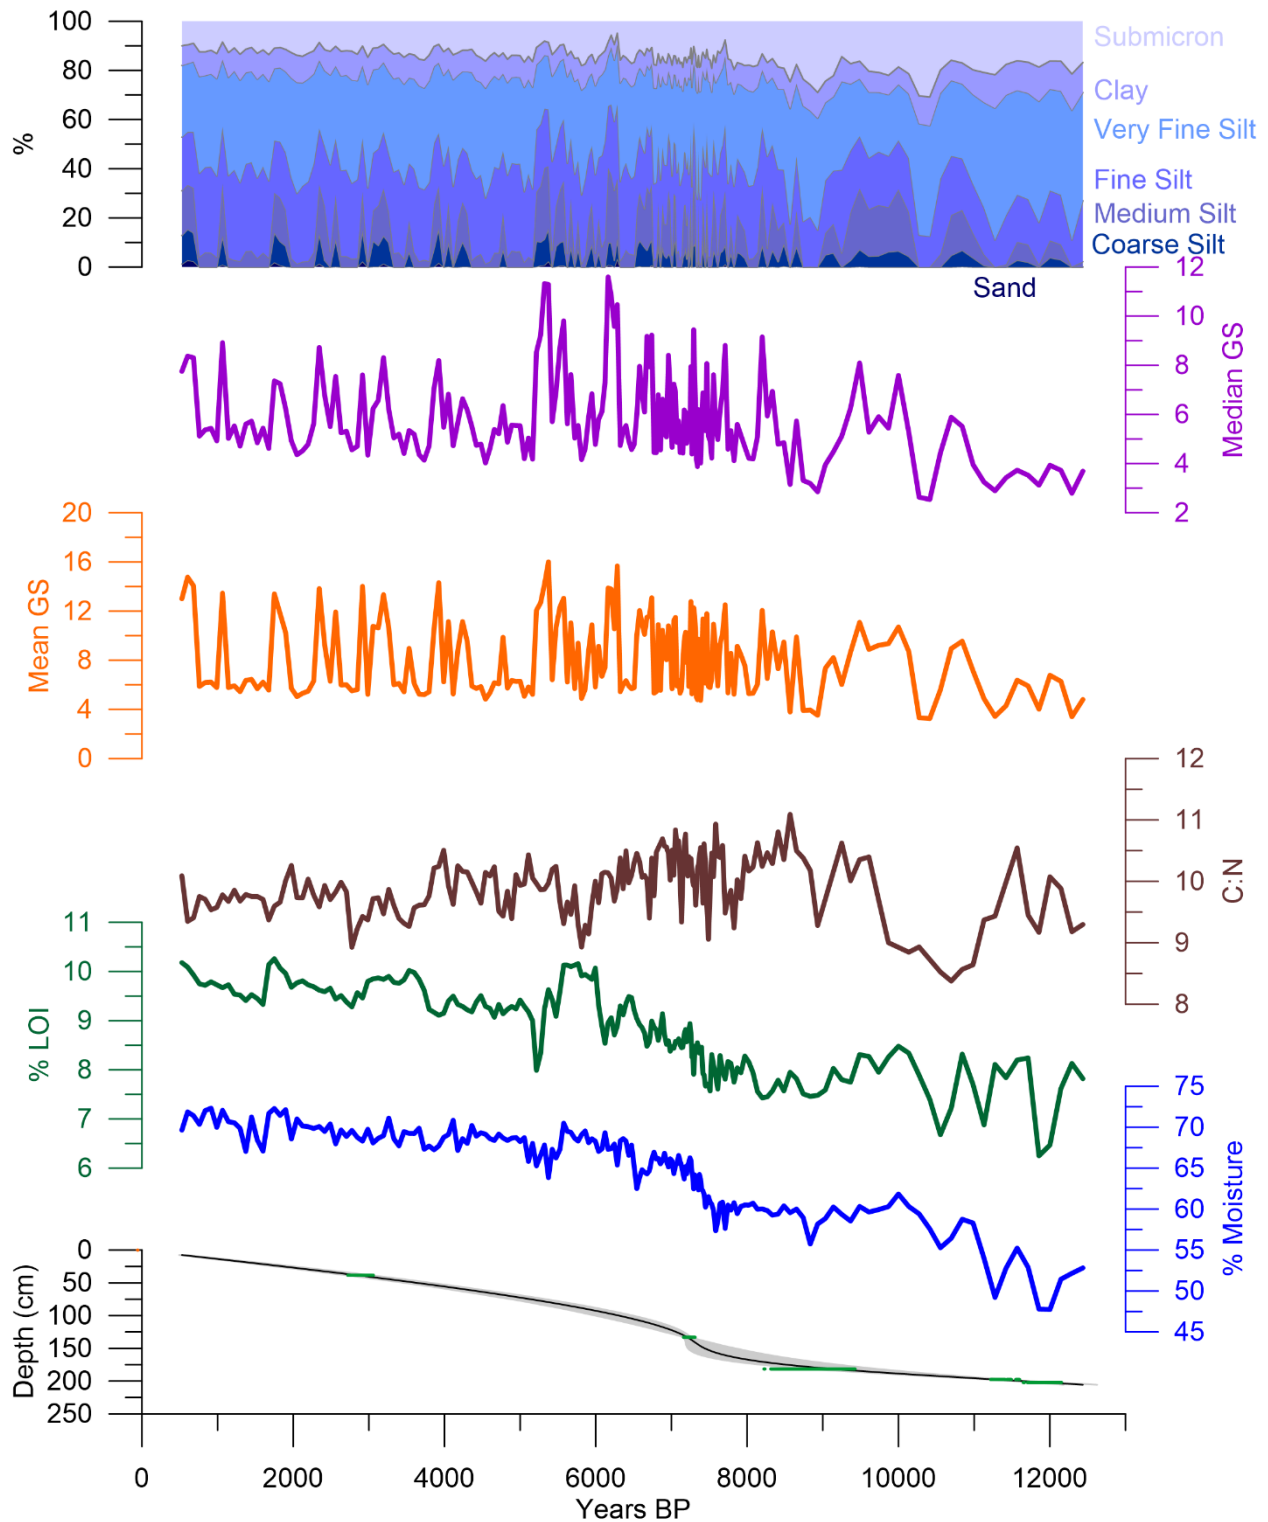

Figure DR19

# Core 05-09d Island Lake (Q)

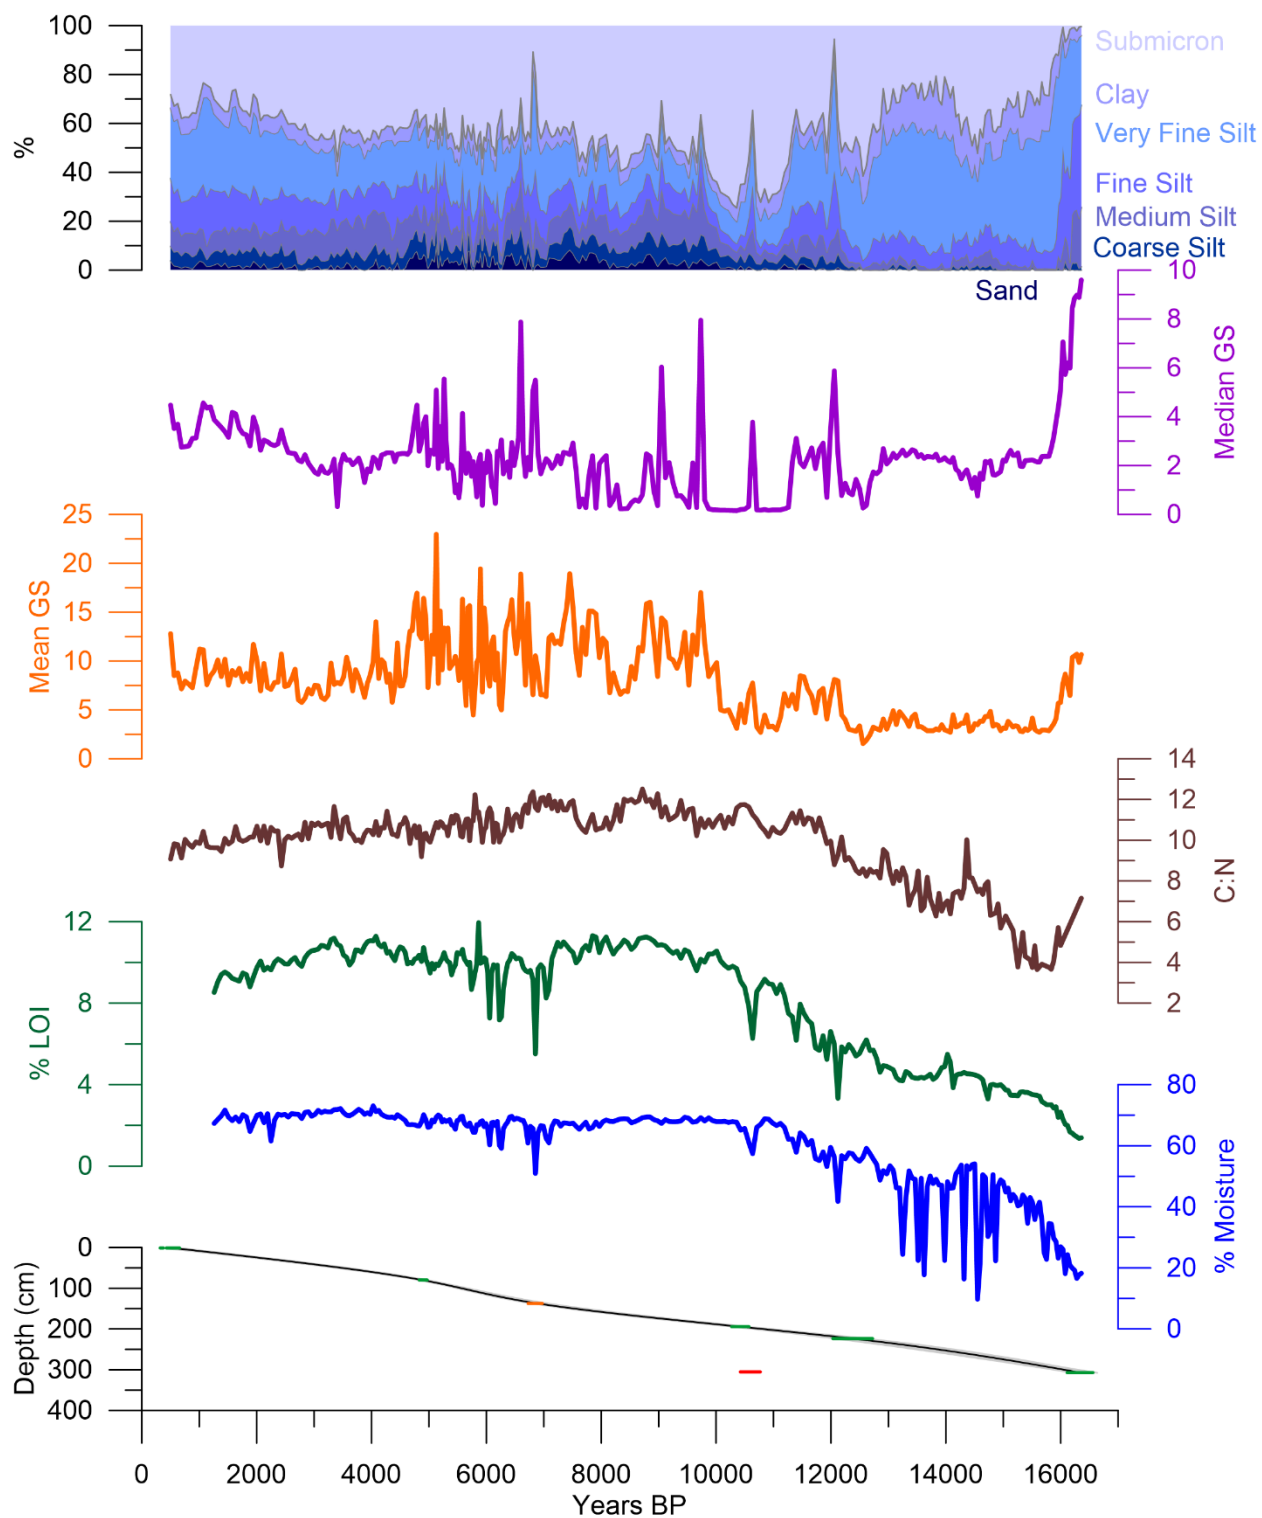

Figure DR20

# Core 05-09e Island Lake (R)

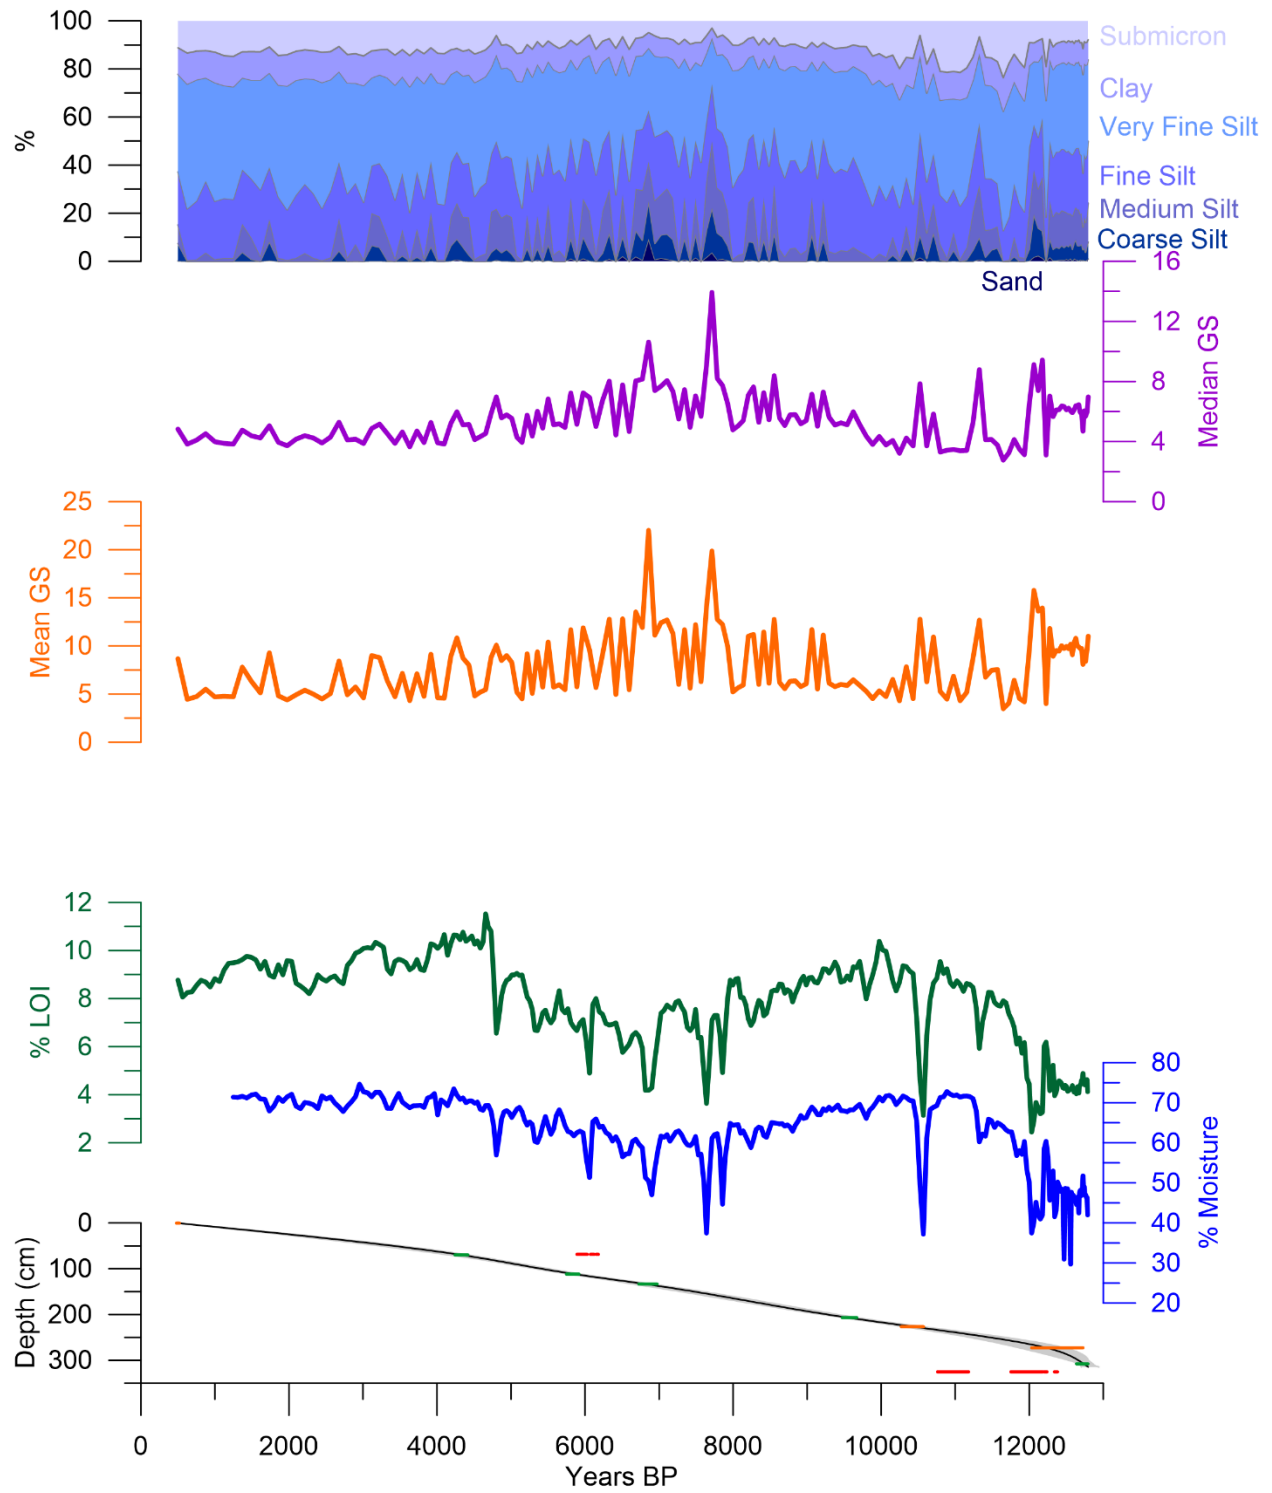

Figure DR21

# Core 05-10 Taylor Lake (S)

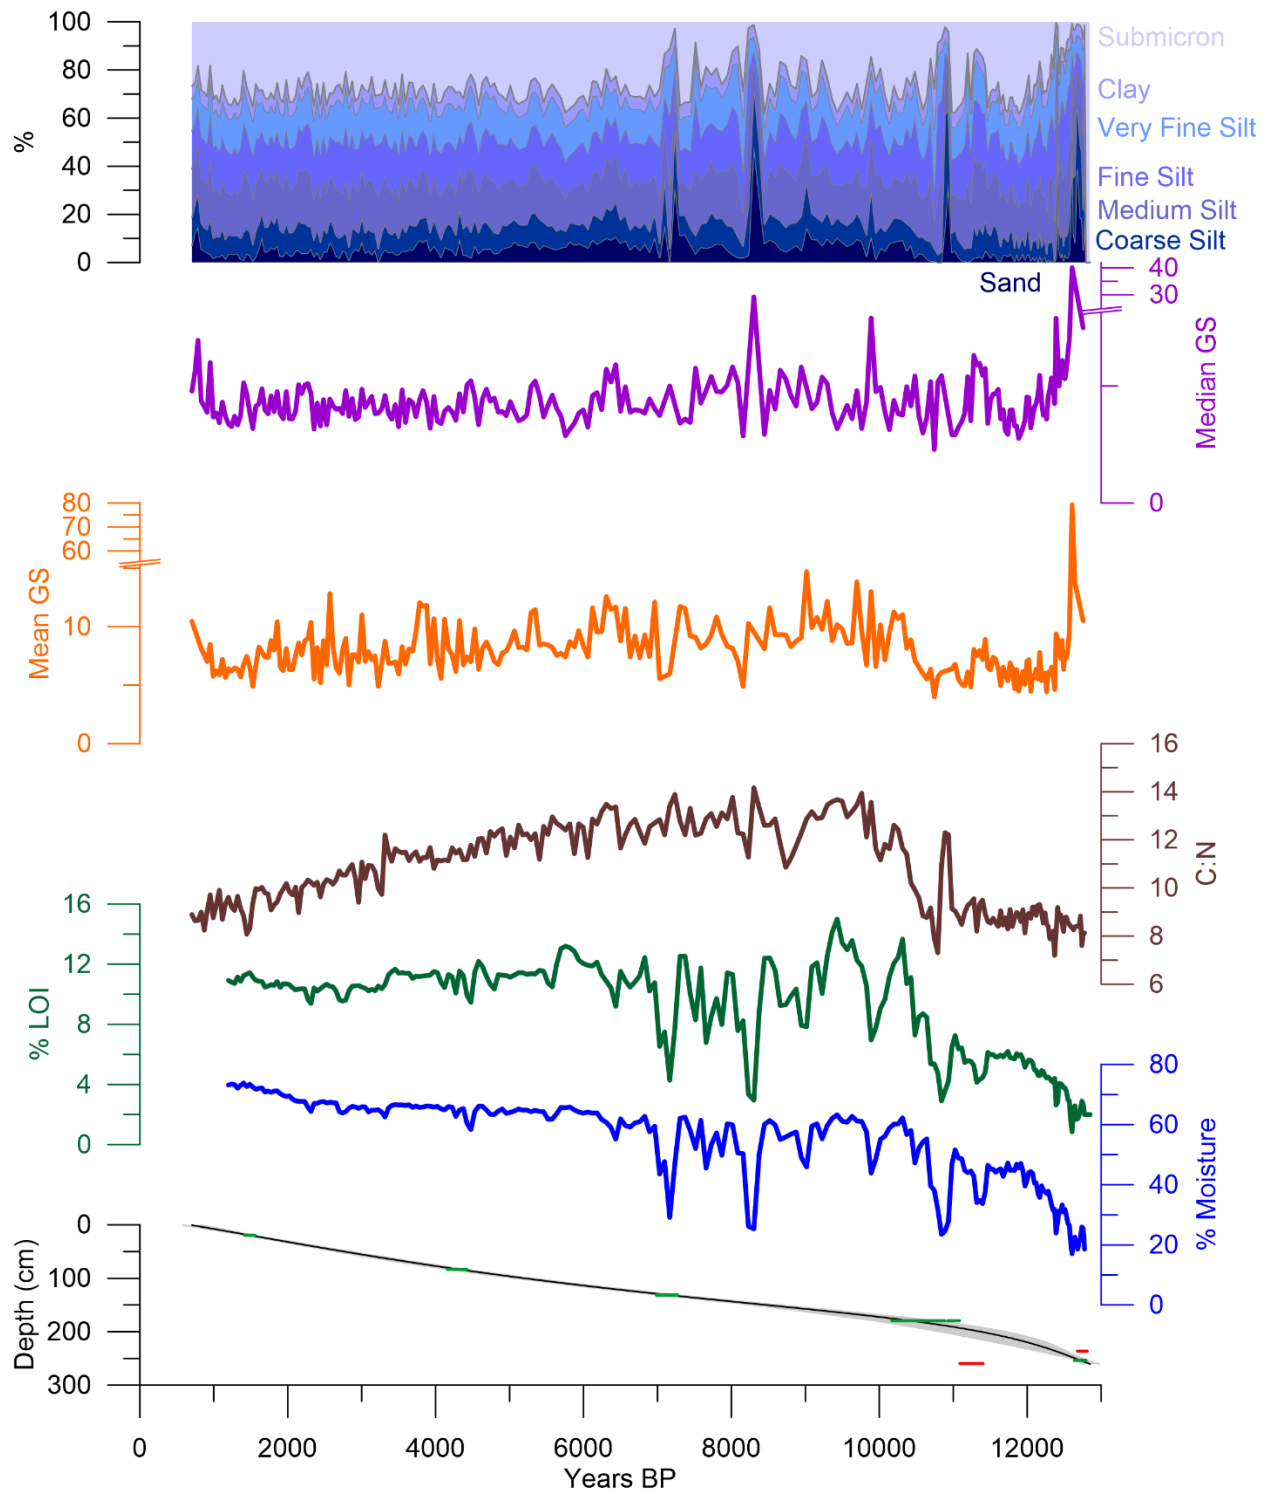

Figure DR22

# Core 06-01 Upper Lily Lake (T)

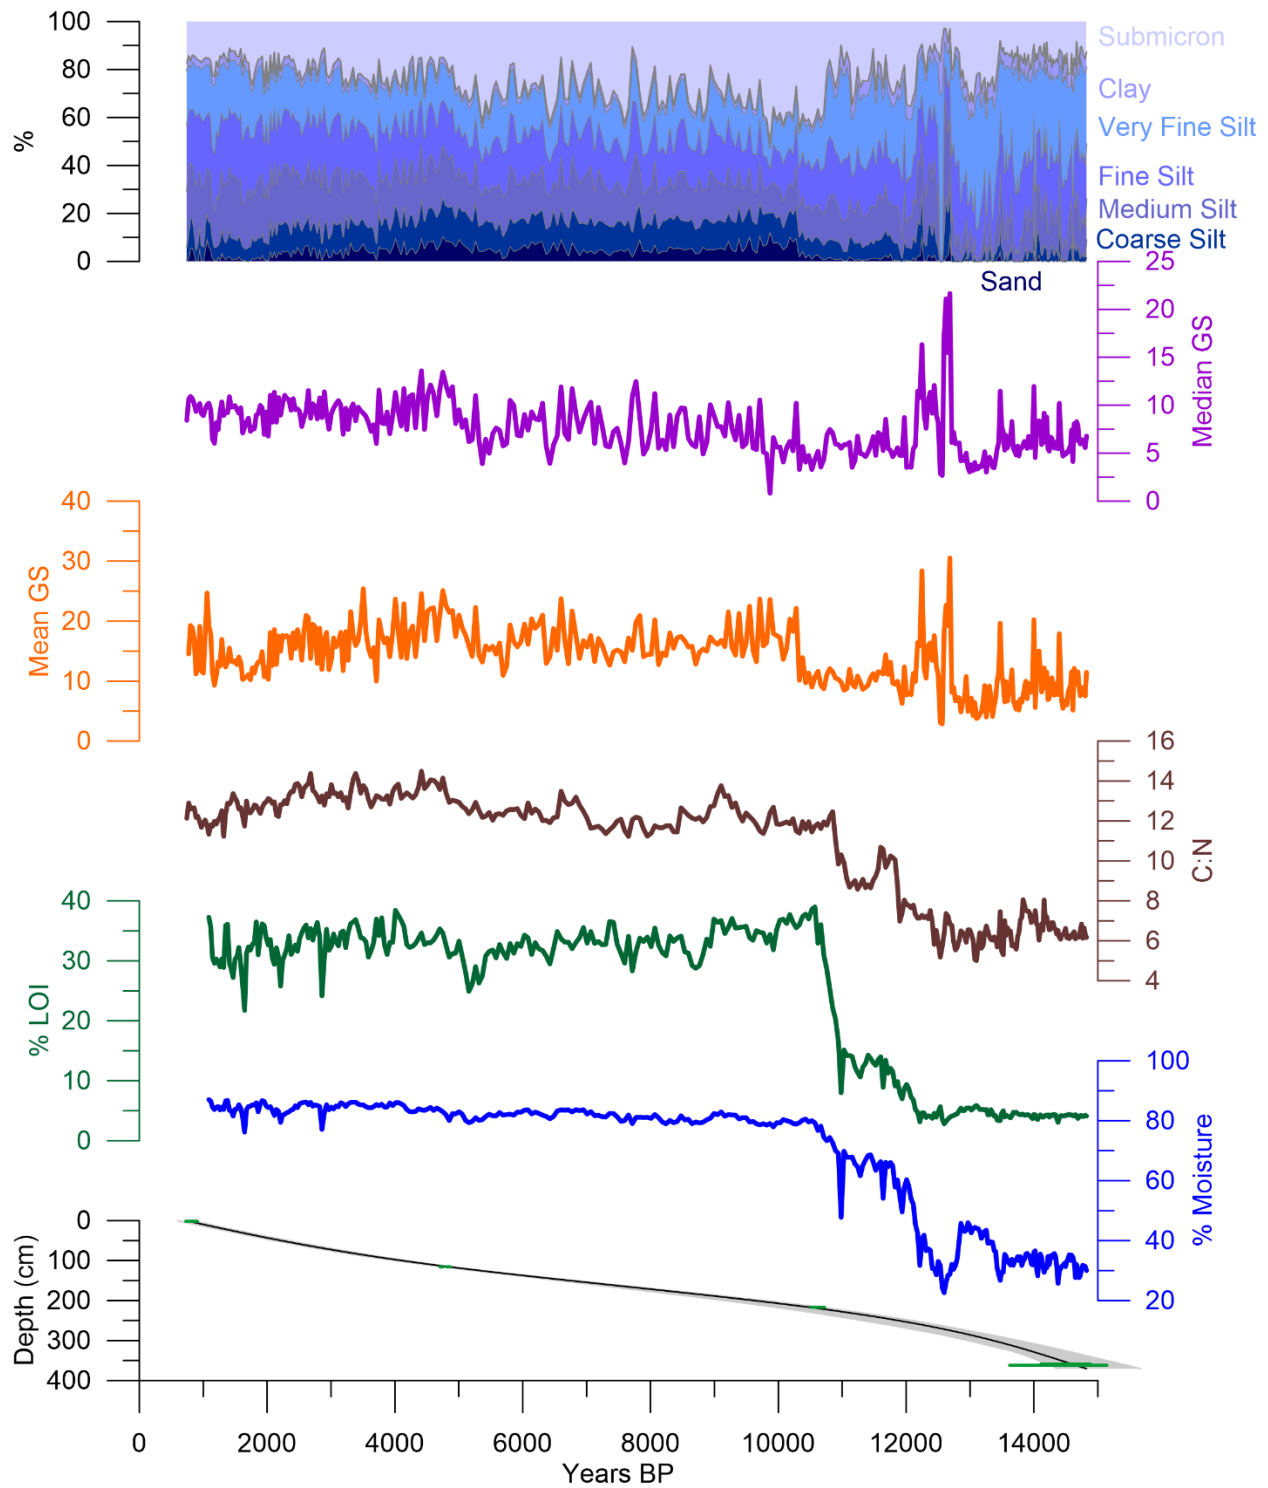

Figure DR23



# Core 98-01 Hacking Lake (U)

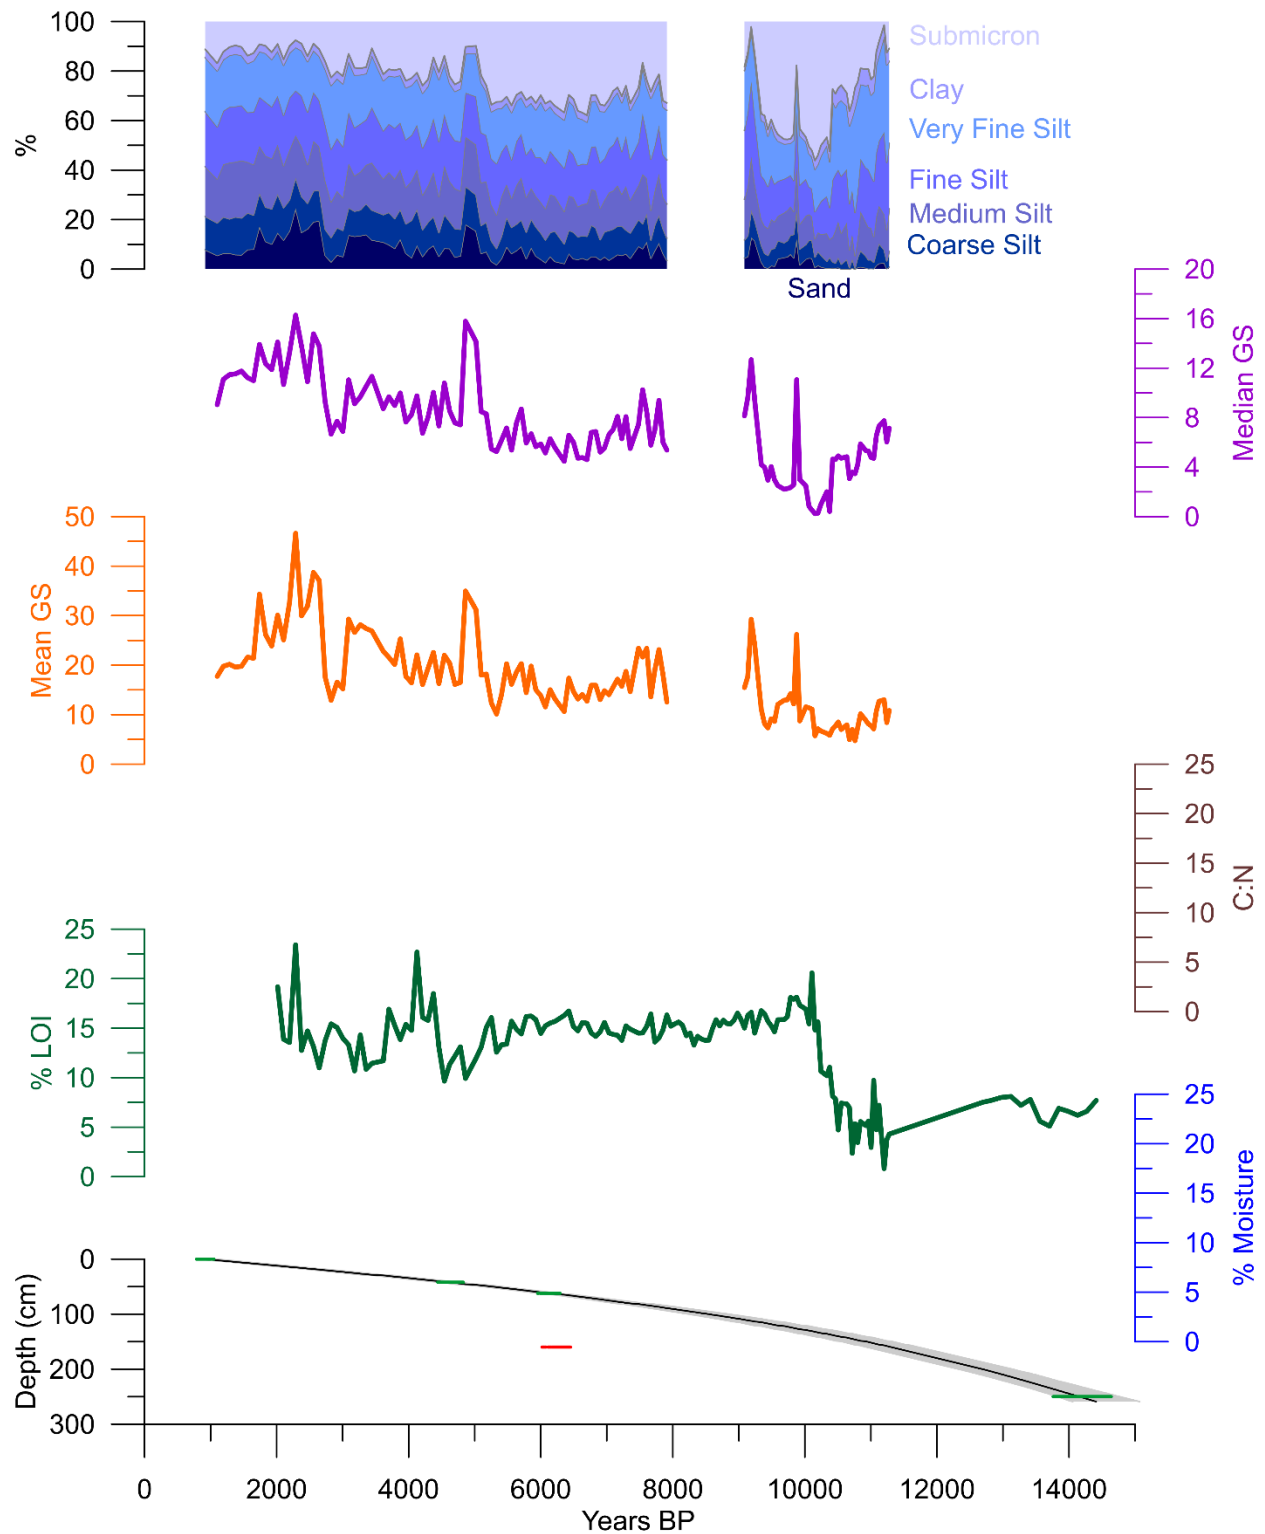

Figure DR24

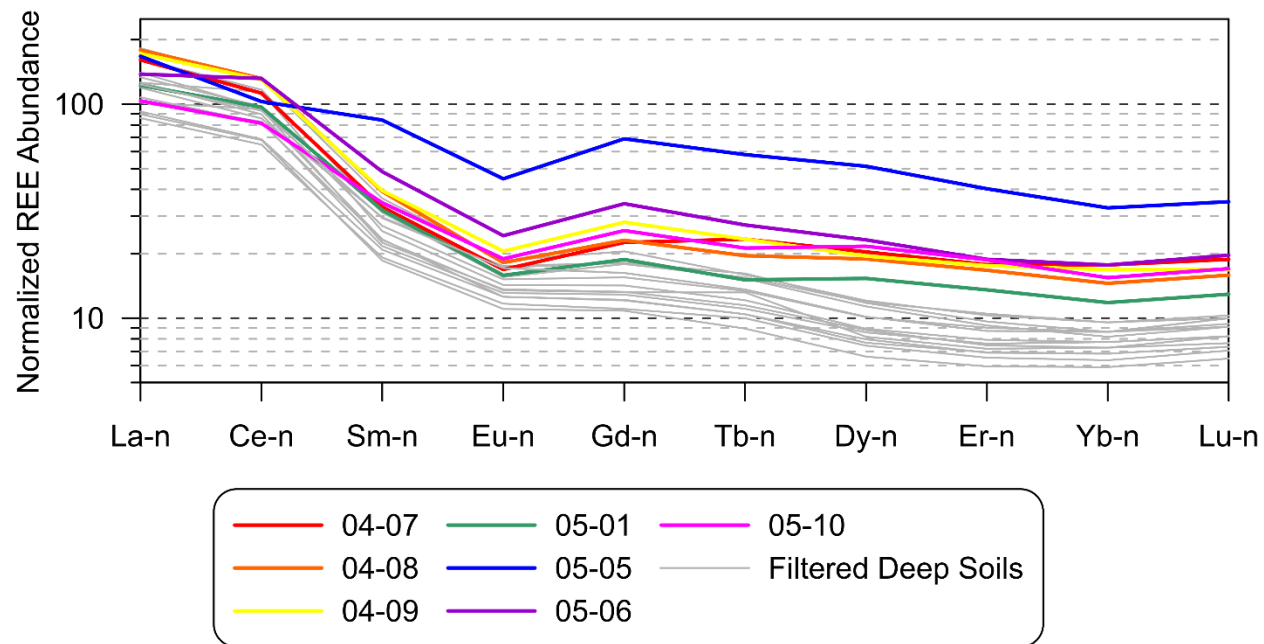

Figure DR25

**Table DR1. Radiocarbon Dates for Uinta Mountain Lake Cores**

| Sample Name<br>--    | Lab ID<br>-- | Age<br>yrs | Error<br>yrs | Material*<br>-- | $\delta^{13}\text{C}$<br>‰ | from<br>yrs BP | to<br>yrs BP   | Probability<br>% | median<br>yrs BP | Age<br>Model** |
|----------------------|--------------|------------|--------------|-----------------|----------------------------|----------------|----------------|------------------|------------------|----------------|
| 04-01b_5-6           | AA-62135     | 1475       | 35           | needle          | -28.11                     | 1480<br>1420   | 1460<br>1290   | 1.1<br>94.3      | 1360             | X              |
| 04-01b_46-47         | AA-62136     | 3464       | 39           | needle          | -26.11                     | 3840           | 3630           | 95.4             | 3740             | X              |
| 04-01b_46-48b        | AA-62137     | 3615       | 42           | bulk            | -27.95                     | 4090<br>4010   | 4030<br>3830   | 9.3<br>86.1      | 3930             | X              |
| 04-01b59-60          | OS-53975     | 4040       | 50           | wood            | -26.56                     | 4810<br>4700   | 4760<br>4670   | 7.9<br>2.3       | 4520             | X              |
| 04-01b102-103        | OS-54187     | 5640       | 50           | wood            | -21.5                      | 4650<br>6540   | 4410<br>6300   | 85.2<br>95.4     | 6420             | X              |
| 04-01b_130           | AA-62138     | 8935       | 52           | wood            | -24.21                     | 10230          | 9900           | 95.4             | 10050            | X              |
| 04-01b_188-190b      | AA-62139     | 10856      | 63           | bulk            | -22.86                     | 12870          | 12670          | 95.4             | 12740            | X              |
| 04-02a_2-3           | AA-62140     | 1835       | 36           | needle          | -25.18                     | 1870<br>1650   | 1690<br>1630   | 94.0<br>1.4      | 1770             | X              |
| 04-02_36-37          | Beta-255412  | 4020       | 20           | needle          | -23.7                      | 4530           | 4420           | 95.4             | 4480             | X              |
| 04-02_50-51          | OS-54167     | 4990       | 75           | needles         | -23.85                     | 5900           | 5600           | 95.4             | 5730             | X              |
| 04-02a_54-55         | AA-62141     | 5391       | 44           | needle          | -24.67                     | 6290<br>6160   | 6170<br>6100   | 68.3<br>14.6     | 6210             | X              |
| 04-02a_111-112       | AA-62142     | 9482       | 54           | needle          | -26.56                     | 6090<br>11080  | 6010<br>10940  | 12.5<br>23.6     | 10750            | X              |
| 04-02a_143-144b      | AA-62143     | 12410      | 120          | bulk            | -23.08                     | 10880<br>15060 | 10570<br>14090 | 71.8<br>95.4     | 14530            | --             |
| 04-02_156            | OS-54088     | 11400      | 65           | pollen          | -25.13                     | 13390          | 13100          | 95.4             | 13240            | X              |
| 04_03_13-14          | AA-62264     | 2032       | 42           | needle          | -23.76                     | 2120           | 1890           | 95.4             | 1990             | X              |
| 04-03_57-58          | OS-54011     | 3970       | 40           | needles         | -23.92                     | 4530           | 4290           | 95.4             | 4440             | X              |
| 04_03_85-86          | AA-62265     | 4831       | 42           | wood            | -27.4                      | 5660<br>5560   | 5570<br>5470   | 46.3<br>49.1     | 5550             | X              |
| 04-03_115-116        | OS-54262     | 7190       | 140          | misc            | -21.31                     | 8330           | 7740           | 95.4             | 8020             | X              |
| 04_03_125-126        | AA-62266     | 7741       | 48           | wood            | -23.31                     | 8600           | 8420           | 95.4             | 8520             | X              |
| 04-03_171-172        | OS-54251     | 9390       | 120          | needles         | -24.46                     | 11090<br>10890 | 10920<br>10260 | 12.6<br>82.8     | 10630            | X              |
| 04_03_177-179        | AA-62267     | 9845       | 64           | bulk            | -28.35                     | 11600<br>11480 | 11550<br>11440 | 1.6<br>1.0       | 11260            | X              |
| 04_04_30-31          | AA-62734     | 3218       | 40           | daphnia         | -27.89                     | 11410<br>3560  | 11150<br>3360  | 92.9<br>95.4     | 3440             | X              |
| 04_04_96-97          | AA-62735     | 5863       | 44           | needle          | -23.4                      | 6790           | 6560           | 95.4             | 6680             | X              |
| 04-04_127-128        | OS-54192     | 8270       | 55           | needle          | -22.69                     | 9440<br>9050   | 9080<br>9030   | 95.1<br>0.3      | 9260             | X              |
| 04_04_142-143        | AA-62736     | 9188       | 54           | needle          | -26.43                     | 10500          | 10240          | 95.4             | 10350            | X              |
| 04-04_153-154-DE     | OS-54166     | 10050      | 60           | daphnia         | -27.54                     | 11930<br>11830 | 11890<br>11280 | 1.6<br>93.8      | 11570            | X              |
| 04-04_153-154-pollen | OS-54306     | 9280       | 65           | pollen          | -26.2                      | 10660<br>10600 | 10620<br>10260 | 2.8<br>92.6      | 10460            | --             |
| 04_04_216-217        | AA-62737     | 12068      | 72           | daphnia         | -18.38                     | 14110          | 13750          | 95.4             | 13920            | X              |
| 04_06_10-11          | AA-62798     | 2756       | 39           | needles         | -26.81                     | 2950           | 2770           | 95.4             | 2850             | X              |
| 04_06_59-60          | AA-62797     | 4995       | 41           | needles         | -23.83                     | 5900           | 5610           | 95.4             | 5720             | X              |
| 04-06_90-91          | Beta-319431  | 6820       | 40           | needle          | -23.8                      | 7720           | 7580           | 95.4             | 7650             | X              |
| 04_06_141-142        | AA-62799     | 9025       | 59           | daphnia         | -24.53                     | 10290<br>10070 | 10110<br>9920  | 78.2<br>17.2     | 10200            | X              |

|                       |             |       |     |              |        |       |       |      |       |    |
|-----------------------|-------------|-------|-----|--------------|--------|-------|-------|------|-------|----|
| 04_06_166-168         | AA-62800    | 11632 | 64  | daphnia      | -23.59 | 13580 | 13310 | 95.4 | 13460 | X  |
| 04_06_185-190         | OS-55207    | 14750 | 90  | pollen       | -24.66 | 18210 | 17680 | 95.4 | 17950 | -- |
| 04_06_190-195         | OS-54030    | 15350 | 80  | pollen       | -24.61 | 18800 | 18430 | 95.4 | 18620 | -- |
|                       |             |       |     |              |        | 1300  | 1170  | 92.9 |       |    |
| 04_07_16-17           | AA-63503    | 1288  | 38  | needle       | -25.12 | 1160  | 1140  | 1.1  | 1230  | X  |
|                       |             |       |     |              |        | 1110  | 1090  | 1.4  |       |    |
| 04_07_51-52           | OS-54103    | 2220  | 35  | needles      | -24.33 | 2330  | 2140  | 95.4 | 2230  | X  |
| 04_07_64-65           | OS-54191    | 2470  | 45  | wood/needles | -21.48 | 2720  | 2370  | 95.4 | 2560  | X  |
| 04_07_172-173         | AA-63504    | 5078  | 44  | wood         | -22.01 | 5920  | 5720  | 95.4 | 5820  | X  |
| 04_07_249-250         | OS-54190    | 7720  | 55  | needles      | -24    | 8600  | 8410  | 95.4 | 8500  | X  |
|                       |             |       |     |              |        | 10650 | 10630 | 0.8  |       |    |
| 04_07_301-302         | AA-63505    | 9277  | 56  | wood         | -21.67 | 10590 | 10260 | 94.6 | 10460 | X  |
|                       |             |       |     |              |        | 11600 | 11560 | 0.7  |       |    |
| 04_07_331-334         | AA-63506    | 9827  | 67  | daphnia      | -27.4  | 11410 | 11100 | 94.7 | 11240 | X  |
|                       |             |       |     |              |        |       |       |      |       |    |
| 04_08_2-3             | AA-64117    | 2010  | 160 | misc         | -24.53 | 2350  | 1600  | 95.4 | 1980  | X  |
|                       |             |       |     |              |        | 3820  | 3800  | 0.7  |       |    |
| 04_08_80-81           | AA-64118    | 3381  | 41  | wood         | -22.65 | 3730  | 3550  | 89.7 | 3620  | X  |
|                       |             |       |     |              |        | 3540  | 3480  | 4.9  |       |    |
| 04_08_125-126         | OS-54001    | 5130  | 50  | wood         | -25.45 | 5990  | 5740  | 95.4 | 5870  | X  |
| 04_08_137-138         | OS-53973    | 5490  | 55  | wood         | -26.86 | 6400  | 6190  | 95.4 | 6290  | X  |
|                       |             |       |     |              |        | 10410 | 10140 | 91.9 |       |    |
|                       |             |       |     |              |        | 10060 | 10040 | 0.9  |       |    |
| 04_08_204-212         | Beta-255413 | 9060  | 60  | needles      | -23.9  | 10030 | 10010 | 0.2  | 10220 | X  |
|                       |             |       |     |              |        | 9990  | 9940  | 2.4  |       |    |
|                       |             |       |     |              |        | 11090 | 10920 | 27.0 |       |    |
| 04_08_229-230         | AA-64120    | 9483  | 64  | wod          | -25.4  | 10890 | 10570 | 68.4 | 10760 | X  |
|                       |             |       |     |              |        | 11700 | 11670 | 0.4  |       |    |
| 04_08_250-252         | OS-55897    | 9700  | 170 | daphnia      | -25    | 11630 | 10570 | 95.0 | 11050 | X  |
|                       |             |       |     |              |        |       |       |      |       |    |
| 04_08_252-254         | OS-54250    | 12150 | 160 | daphnia      | -27.34 | 14750 | 13590 | 95.4 | 14070 | -- |
| 04_08_255-256         | AA-64121    | 13610 | 350 | daphnia      | -26.4  | 17480 | 15450 | 95.4 | 16460 | -- |
|                       |             |       |     |              |        |       |       |      |       |    |
| 04_09_92-93           | AA-65027    | 5130  | 130 | carex        | -24.8  | 6190  | 5600  | 95.4 | 5880  | X  |
| 04_09_121-122         | AA-65028    | 6334  | 58  | needle       | -24    | 7420  | 7160  | 95.4 | 7270  | X  |
|                       |             |       |     |              |        | 11080 | 10930 | 24.6 |       |    |
| 04_09_173-174         | AA-65029    | 9481  | 58  | daphnia      | -25    | 10880 | 10570 | 70.8 | 10750 | X  |
|                       |             |       |     |              |        |       |       |      |       |    |
| 04_09_176-177         | AA-65030    | 7527  | 55  | daphnia      | -22.6  | 8420  | 8200  | 95.4 | 8350  | -- |
|                       |             |       |     |              |        | 11600 | 11550 | 1.9  |       |    |
| 04_09_177-179         | OS-54194    | 9860  | 60  | daphnia      | -21.49 | 11480 | 11440 | 1.1  | 11270 | X  |
|                       |             |       |     |              |        | 11410 | 11170 | 92.4 |       |    |
|                       |             |       |     |              |        |       |       |      |       |    |
| 05-01b_31-33          | OS-54821    | 1820  | 80  | misc         | -25.23 | 1930  | 1560  | 95.4 | 1750  | X  |
|                       |             |       |     |              |        | 5590  | 5510  | 12.0 |       |    |
| 05-01b_106-107        | OS-53964    | 4660  | 55  | needle       | -25.32 | 5490  | 5290  | 83.4 | 5400  | X  |
|                       |             |       |     |              |        |       |       |      |       |    |
| 05-01b_150-151        | OS-54188    | 7860  | 65  | needle       | -26.11 | 8980  | 8530  | 95.4 | 8680  | X  |
|                       |             |       |     |              |        | 11250 | 11060 | 59.5 |       |    |
| 05-01b_218-220        | OS-55206    | 9700  | 70  | pollen       | -25.78 | 11040 | 10780 | 35.9 | 11110 | X  |
|                       |             |       |     |              |        |       |       |      |       |    |
| 05-01b_220-221        | OS-54085    | 9560  | 60  | needle       | -23.18 | 11140 | 10700 | 95.4 | 10920 | X  |
|                       |             |       |     |              |        | 12060 | 11600 | 92.1 |       |    |
|                       |             |       |     |              |        |       |       |      |       |    |
| 05-01b_238-240-DE     | OS-55443    | 10150 | 55  | daphnia      | -25.9  | 11550 | 11490 | 2.6  | 11820 | X  |
|                       |             |       |     |              |        | 11430 | 11410 | 0.7  |       |    |
|                       |             |       |     |              |        | 12530 | 12470 | 4.4  |       |    |
| 05-01b_238-240-pollen | OS-55187    | 10400 | 50  | pollen       | -25.33 | 12430 | 12060 | 91.0 | 12270 | X  |
|                       |             |       |     |              |        |       |       |      |       |    |
|                       |             |       |     |              |        | 11080 | 10940 | 16.3 |       |    |
| 05-01b_242-246        | OS-54031    | 9460  | 60  | pollen       | -24.73 | 10880 | 10550 | 79.1 | 10710 | -- |
|                       |             |       |     |              |        |       |       |      |       |    |
| 05-02_21-22           | OS-56140    | 1860  | 90  | needle       | -25.23 | 2000  | 1570  | 95.4 | 1790  | X  |

|                      |             |       |     |             |        |       |       |      |       |    |
|----------------------|-------------|-------|-----|-------------|--------|-------|-------|------|-------|----|
| 05-02_62-63          | OS-55674    | 3490  | 45  | misc        | -22.91 | 3880  | 3640  | 95.4 | 3760  | X  |
| 05-02_123-124        | OS-55454    | 5500  | 45  | wood        | -23.86 | 6410  | 6260  | 81.3 | 6300  | X  |
|                      |             |       |     |             |        | 6250  | 6210  | 14.1 |       |    |
|                      |             |       |     |             |        | 8970  | 8910  | 2.8  |       |    |
| 05-02_168            | OS-55449    | 7860  | 45  | wood        | -24.17 | 8900  | 8880  | 0.2  | 8650  | X  |
|                      |             |       |     |             |        | 8870  | 8830  | 2.9  |       |    |
|                      |             |       |     |             |        | 8790  | 8540  | 89.5 |       |    |
| 05-02_207-210-twigg  | OS-55419    | 10000 | 55  | wood        | -27.7  | 11750 | 11740 | 0.3  | 11480 | X  |
|                      |             |       |     |             |        | 11720 | 11260 | 95.1 |       |    |
| 05-02_207-210-pollen | OS-55208    | 9390  | 50  | pollen      | -25.27 | 10750 | 10500 | 95.4 | 10620 | -- |
| 05-02_210-213        | OS-55209    | 9700  | 40  | pollen      | -24.86 | 11230 | 11070 | 84.2 | 11150 | X  |
|                      |             |       |     |             |        | 10950 | 10870 | 11.2 |       |    |
| 05-03_169-170        | OS-58882    | 6890  | 45  | needle      | -24.31 | 7840  | 7650  | 93.7 | 7720  | X  |
|                      |             |       |     |             |        | 7640  | 7620  | 1.7  |       |    |
| 05-04d_9-10          | OS-56145    | 890   | 95  | needle      | -24.69 | 970   | 660   | 95.4 | 820   | X  |
|                      |             |       |     |             |        | 4790  | 4760  | 2.8  |       |    |
| 05-04d_93-94         | OS-55675    | 4010  | 50  | needle      | -25.09 | 4630  | 4350  | 90.8 | 4490  | X  |
|                      |             |       |     |             |        | 4330  | 4290  | 1.8  |       |    |
| 05-04d_216-217       | OS-55655    | 3950  | 40  | wood        | -25.2  | 4530  | 4250  | 95.4 | 4410  | -- |
|                      |             |       |     |             |        | 9540  | 9400  | 92.8 |       |    |
| 05-04d_280           | OS-55448    | 8440  | 45  | wood        | -21.48 | 9350  | 9320  | 2.6  | 9470  | X  |
|                      |             |       |     |             |        | 11610 | 11520 | 8.1  |       |    |
| 05-04d_312-313       | OS-55506    | 9920  | 50  | wood/needle | -26.06 | 11500 | 11220 | 87.3 | 11320 | X  |
|                      |             |       |     |             |        | 13010 | 12730 | 95.4 |       |    |
| 05-04d_312-313       | OS-55651    | 11000 | 50  | daphnia     | -27.71 | 13010 | 12730 | 95.4 | 12860 | -- |
| 05-04d_339-343       | OS-55210    | 11500 | 55  | pollen      | -25    | 13470 | 13230 | 95.4 | 13350 | X  |
| 05-04d_343-347       | OS-55198    | 11300 | 55  | pollen      | -24.97 | 13270 | 13060 | 95.4 | 13150 | X  |
| 05-05_14-15          | OS-58744    | 5300  | 35  | wood        | -26.62 | 6190  | 5980  | 93.7 | 6080  | X  |
|                      |             |       |     |             |        | 5970  | 5950  | 1.7  |       |    |
| 05-05_125-126        | OS-58745    | 9870  | 70  | wood        | -24.77 | 11610 | 11520 | 6.1  | 11290 | X  |
|                      |             |       |     |             |        | 11500 | 11170 | 89.3 |       |    |
| 05-05_137-142        | Beta-336513 | 10580 | 50  | misc        | -22.9  | 12680 | 12420 | 95.4 | 12570 | X  |
| 05-06_74-75          | OS-54168    | 2030  | 40  | needle      | -22.42 | 2120  | 1890  | 95.4 | 1980  | X  |
| 05-06_147-148        | OS-54824    | 3650  | 100 | needle      | -25    | 4290  | 4270  | 0.4  | 3980  | X  |
|                      |             |       |     |             |        | 4260  | 3690  | 95.0 |       |    |
| 05-06_204-205        | OS-54013    | 5330  | 60  | needle      | -25.71 | 6280  | 5980  | 93.2 | 6110  | X  |
|                      |             |       |     |             |        | 5970  | 5940  | 2.3  |       |    |
| 05-06_303-305        | OS-54095    | 8790  | 55  | cone        | -24.08 | 10150 | 9980  | 14.3 | 9820  | X  |
|                      |             |       |     |             |        | 9960  | 9590  | 81.2 |       |    |
| 05-06_352-353.5      | OS-55200    | 10400 | 65  | pollen      | -25.13 | 12530 | 12030 | 95.4 | 12270 | X  |
| 05-06_353.5-355      | OS-55654    | 10750 | 55  | daphnia     | -22.75 | 12750 | 12590 | 95.4 | 12690 | X  |
| 05-06_353.5-355      | OS-54204    | 10900 | 60  | pollen      | -24.94 | 12930 | 12690 | 95.4 | 12770 | X  |
| 05-07_101-102        | Beta-336515 | 3880  | 40  | needles     | --     | 4420  | 4220  | 88.3 | 4320  | X  |
|                      |             |       |     |             |        | 4210  | 4150  | 7.1  |       |    |
| 05-07_169-170        | OS-59221    | 5010  | 95  | wood        | -24.9  | 5940  | 5580  | 95.4 | 5760  | X  |
| 05-07_230-231        | OS-58736    | 6980  | 45  | carex       | -13.41 | 7940  | 7890  | 14.3 | 7810  | X  |
|                      |             |       |     |             |        | 7880  | 7690  | 81.1 |       |    |
| 05-08_31-32          | OS-59227    | 2720  | 85  | needle      | -25.46 | 3070  | 2710  | 95.4 | 2840  | X  |
| 05-08_126            | OS-58746    | 6290  | 40  | wood        | -21.95 | 7320  | 7150  | 95.4 | 7220  | X  |
|                      |             |       |     |             |        | 9430  | 8300  | 94.7 |       |    |
| 05-08_174-175        | OS-59244    | 7890  | 250 | charcoal    | -23.18 | 8250  | 8210  | 0.7  | 8780  | X  |
|                      |             |       |     |             |        | 11610 | 11540 | 5.2  |       |    |
| 05-08_190-191        | OS-58887    | 9910  | 50  | daphnia     | -22.7  | 11500 | 11210 | 90.2 | 11310 | X  |
|                      |             |       |     |             |        |       |       |      |       |    |

|                |             |       |     |         |        |                      |                      |                    |       |    |
|----------------|-------------|-------|-----|---------|--------|----------------------|----------------------|--------------------|-------|----|
| 05-08_191-199  | Beta-255414 | 10220 | 60  | daphnia | -23.3  | 12160<br>11670       | 11690<br>11640       | 1.0                | 11930 | X  |
| 05-09d_1       | OS-54259    | 495   | 80  | needle  | -26.09 | 660<br>380           | 420<br>320           | 87.4<br>8.0        | 530   | X  |
| 05-09d_79-80   | OS-54414    | 4310  | 40  | needle  | -25.55 | 4980                 | 4820                 | 95.4               | 4870  | X  |
| 05-09d_195-196 | OS-54096    | 9260  | 55  | wood    | -26.34 | 10580                | 10260                | 95.4               | 10440 | X  |
| 05-09d_223-224 | OS-54813    | 10550 | 150 | needle  | -24.71 | 12730                | 12010                | 95.4               | 12450 | X  |
| 05-09d_304-306 | OS-54195    | 9390  | 60  | pollen  | -25.29 | 10770                | 10420                | 95.4               | 10620 | -- |
| 05-09d_306-308 | OS-111364   | 13550 | 60  | pollen  | -24.66 | 16570                | 16100                | 95.4               | 16320 | X  |
| 05-09e_68-69   | OS-54086    | 5200  | 40  | needles | -22.82 | 6180<br>6120<br>6030 | 6150<br>6070<br>5890 | 1.9<br>3.9<br>89.6 | 5960  | -- |
| 05-09e_69-70   | Beta-319432 | 3890  | 30  | misc    | -23.3  | 4420                 | 4240                 | 95.4               | 4330  | X  |
| 05-09e_111-112 | OS-54433    | 5100  | 35  | wood    | -22.81 | 5920                 | 5740                 | 95.4               | 5820  | X  |
| 05-09e_143     | OS-54189    | 6000  | 50  | wood    | -23.8  | 6980                 | 6710                 | 95.4               | 6840  | X  |
| 05-09e_220     | OS-54097    | 8570  | 60  | cone    | -21.19 | 9680                 | 9470                 | 95.4               | 9540  | X  |
| 05-09e_320-321 | OS-55197    | 10550 | 55  | pollen  | -25.49 | 12680                | 12390                | 95.4               | 12530 | X  |
| 05-09e_320-321 | OS-55450    | 10800 | 60  | daphnia | -25.96 | 12800<br>12380       | 12630<br>12340       | 95.4<br>1.1        | 12710 | X  |
| 05-09e_324-326 | OS-55420    | 10250 | 55  | daphnia | -24.94 | 12240<br>12180       | 12200<br>11750       | 1.6<br>92.7        | 11990 | -- |
| 05-09e_324-326 | OS-54028    | 9620  | 55  | pollen  | -25.64 | 11180                | 10760                | 95.4               | 10950 | -- |
| 05-10b_19-20   | OS-54010    | 1610  | 30  | needle  | -23.86 | 1560                 | 1410                 | 95.4               | 1490  | X  |
| 05-10b_90-91   | OS-54094    | 3890  | 40  | wood    | -23.81 | 4430<br>4200         | 4220<br>4150         | 91.1<br>4.4        | 4330  | X  |
| 05-10b_140-141 | OS-53976    | 6240  | 60  | needles | -25.2  | 7280                 | 6970                 | 95.4               | 7160  | X  |
| 05-10b_188     | OS-56141    | 9270  | 160 | needle  | -25    | 11090                | 10160                | 95.4               | 10480 | X  |
| 05-10b_245-246 | OS-54012    | 10850 | 70  | misc    | -25.38 | 12900                | 12650                | 95.4               | 12740 | -- |
| 05-10b_258-266 | OS-55453    | 10800 | 60  | daphnia | -16.92 | 12800                | 12630                | 95.4               | 12710 | X  |
| 05-10b_267-270 | OS-55927    | 9800  | 65  | daphnia | -19.41 | 11400                | 11090                | 95.4               | 11220 | -- |
| 05-10b_267-270 | OS-54029    | 13850 | 65  | pollen  | -24.7  | 17030                | 16490                | 95.4               | 16770 | -- |
| 06-01_1-2      | OS-58079    | 880   | 35  | needle  | -24.23 | 920<br>4870          | 720<br>4810          | 95.4<br>80.7       | 790   | X  |
| 06-01_115-116  | Beta-319433 | 4250  | 30  | misc    | -25    | 4760<br>4670         | 4700<br>4660         | 14.3<br>0.4        | 4840  | X  |
| 06-01_216-217  | OS-58078    | 9390  | 45  | wood    | -24.45 | 10730                | 10500                | 95.4               | 10620 | X  |
| 06-01_257-258  | OS-59799    | 12900 | 200 | needle  | -23.61 | 16080                | 14700                | 95.4               | 15420 | -- |
| 06-01_357-361  | Beta-252959 | 12380 | 80  | misc    |        | 14900                | 14100                | 95.4               | 14450 | X  |
| 06-01_361-363  | OS-59807    | 12250 | 230 | misc    | -26.44 | 15140<br>13680       | 13700<br>13620       | 94.6<br>0.8        | 14320 | X  |
| 06-01_367-369  | OS-57988    | 24400 | 100 | daphnia | -30.59 | 28720                | 28160                | 95.4               | 28460 | -- |
| HL-465         | AA-32838    | 1000  | 55  | wood    | --     | 1060<br>1010         | 1020<br>780          | 3.4<br>92.0        | 910   | X  |
| HL-506         | AA-32839    | 4105  | 70  | needle  | --     | 4830                 | 4440                 | 95.4               | 4640  | X  |
| HL-528         | AA-32840    | 5365  | 75  | wood    | --     | 6300<br>5970         | 5980<br>5940         | 93.9<br>1.5        | 6140  | X  |
| HL-625         | AA-32842    | 5495  | 75  | misc    | --     | 6450<br>6160<br>6080 | 6170<br>6110<br>6060 | 91.4<br>2.5<br>0.5 | 6300  | -- |
| HL-715         | AA-35250    | 12190 | 120 | daphnia | --     | 6050<br>14660        | 6020<br>13750        | 1.0<br>95.4        | 14100 | X  |

\* "needle" = conifer needle, "bulk" = bulk organic matter, "misc" = unidentified, "daphnia" = daphnia ephippia,

pollen = concentrated pollen, "carex" = sedge fragments, "cone" = conifer cone  
\*\* "X" = used in depth-age model, "--" = not used in depth-age model

**Table DR2. Characteristics of Depth-Age Models for Uinta Mountain Lake Cores**

| <b>Fig. 1<br/>Code</b> | <b>Core</b> | <b>Lake Name</b> | <b>Spline Fit</b> | <b># of 14C ages<br/>per model</b> | <b># of 14C ages<br/>ignored</b> | <b># of all ages*<br/>per model</b> | <b>Upward**<br/>Extrapolation</b> | <b>Downward**<br/>Extrapolation</b> |
|------------------------|-------------|------------------|-------------------|------------------------------------|----------------------------------|-------------------------------------|-----------------------------------|-------------------------------------|
| A                      | 04-01       | Marshall         | 6.94              | 7                                  | 0                                | 9                                   | 0                                 | 1                                   |
| B                      | 04-02       | Hoover           | 4.58              | 6                                  | 1                                | 6                                   | 2                                 | 0                                   |
| C                      | 04-03       | Pyramid          | 10.71             | 7                                  | 0                                | 7                                   | 13                                | 2                                   |
| D                      | 04-04       | Elbow            | 4.85              | 6                                  | 1                                | 6                                   | 30                                | 0                                   |
| E                      | 04-06       | Swasey           | 6.59              | 5                                  | 2                                | 5                                   | 10                                | 31                                  |
| F                      | 04-07       | Spider           | 5.32              | 7                                  | 0                                | 7                                   | 16                                | 1                                   |
| G                      | 04-08       | Little Superior  | 8.38              | 7                                  | 2                                | 7                                   | 2                                 | 13                                  |
| H                      | 04-09       | North Star       | 2.37              | 4                                  | 1                                | 4                                   | 92                                | 20                                  |
| I                      | 05-01       | Reader           | 8.49              | 6                                  | 1                                | 6                                   | 31                                | 7                                   |
| J                      | 05-02       | Ostler           | 2.07              | 5                                  | 1                                | 5                                   | 21                                | 3                                   |
| K                      | 05-03       | Kermseh          | 24.69             | 6                                  | 0                                | 6                                   | 14                                | 4                                   |
| L                      | 05-04       | Ryder            | 11.16             | 6                                  | 2                                | 6                                   | 9                                 | 2                                   |
| M                      | 05-05       | Lower Red Castle | 1.46              | 3                                  | 0                                | 3                                   | 14                                | 2                                   |
| N                      | 05-06       | Bald             | 12.64             | 7                                  | 0                                | 7                                   | 74                                | 0                                   |
| O                      | 05-07       | Hessie           | 2.13              | 3                                  | 0                                | 3                                   | 101                               | 27                                  |
| P                      | 05-08       | Deadhorse        | 4.15              | 5                                  | 0                                | 6                                   | 0                                 | 0                                   |
| Q                      | 05-09d      | Island           | 4.59              | 6                                  | 1                                | 6                                   | 1                                 | 1                                   |
| R                      | 05-09e      | Island           | 10.14             | 7                                  | 3                                | 8                                   | 0                                 | 19                                  |
| S                      | 05-10       | Taylor           | 4.84              | 5                                  | 3                                | 5                                   | 19                                | 16                                  |
| T                      | 06-01       | Upper Lily       | 14.26             | 4                                  | 2                                | 4                                   | 1                                 | 12                                  |
| U                      | 98-01       | Hacking          | 1.88              | 4                                  | 1                                | 4                                   | 0                                 | 9                                   |

\*including ages from other cores matched by comparison of LOI patterns

\*\*cm of extrapolation necessary in CLAM to extend the depth-age model to the ultimate core top and base



**Table DR3. Relationships Between %LOI and C:N in Uinta Mountain Lake Cores**

| Fig. 1<br>Code* | Lake<br>Name     | Lake<br>ID | Spearman<br>r | r <sup>2</sup> | P-value | # of<br>Inflows | Note                                                  |
|-----------------|------------------|------------|---------------|----------------|---------|-----------------|-------------------------------------------------------|
| G               | Little Superior  | 04-08      | 0.922         | 0.850          | 0.000   | 3               | Major inflow                                          |
| D               | Elbow            | 04-04      | 0.842         | 0.709          | 0.000   | 1               | Major inflow                                          |
| H               | North Star       | 04-09      | 0.825         | 0.681          | 0.000   | 1               | Major inflow                                          |
| M               | Lower Red Castle | 05-05      | 0.795         | 0.632          | 0.000   | 1               | Major inflow                                          |
| S               | Upper Lily Pad   | 06-01      | 0.744         | 0.554          | 0.000   | 0               | Productive meadow to west, steep slopes on south side |
| Q               | Island           | 05-09      | 0.661         | 0.437          | 0.000   | 2               | Major inflow                                          |
| N               | Bald             | 05-06      | 0.643         | 0.413          | 0.000   | 0               | Steep slopes on west side, no inflow                  |
| L               | Ryder            | 05-04      | 0.632         | 0.399          | 0.000   | 1               | Waterfall inflow                                      |
| B               | Hoover           | 04-02      | 0.578         | 0.334          | 0.000   | 2               | Major inflow                                          |
| I               | Reader           | 05-01      | 0.562         | 0.316          | 0.000   | 0               | Steep slopes on north side                            |
| R               | Taylor           | 05-10      | 0.536         | 0.287          | 0.000   | 0               | Steep slopes on west side                             |
| F               | Spider           | 04-07      | 0.456         | 0.208          | 0.000   | 2               | Multiple inflows                                      |
| E               | Swasey           | 04-06      | 0.308         | 0.095          | 0.000   | 0               | Several streams on west end                           |
| C               | 05-087           | 04-03      | 0.216         | 0.047          | 0.004   | 0               | No real inflow                                        |
| O               | Hessie           | 05-07      | 0.146         | 0.021          | 0.019   | 0               | No real inflow                                        |
| A               | Marshall         | 04-01      | 0.031         | 0.001          | 0.674   | 0               | Small inlet on SW corner                              |
| J               | Ostler           | 05-02      | -0.087        | 0.008          | 0.205   | 0               | Weak inflow                                           |
| K               | Kermseh          | 05-03      | -0.139        | 0.019          | 0.040   | 2               | Weak inflow                                           |
| P               | Deadhorse        | 05-08      | -0.293        | 0.086          | 0.000   | 0               | Rock glaciers and talus into lake                     |

\*C:N was not measured in cores 98-01 (U) and 05-09e (R)
